1 **Instance segmentation of mitochondria in electron microscopy images with a generalist**  
2 **deep learning model.**

3

4 Ryan Conrad <sup>1,2</sup> and Kedar Narayan <sup>1,2</sup>

5 <sup>1</sup> Center for Molecular Microscopy, Center for Cancer Research, National Cancer Institute,  
6 National Institutes of Health, Bethesda 20892, Maryland, USA.

7 <sup>2</sup> Cancer Research Technology Program, Frederick National Laboratory for Cancer Research,  
8 Frederick 21702, Maryland, USA.

9

10 **Abstract**

11 Mitochondria are extremely pleomorphic in biology. Automatically identifying each one  
12 precisely and accurately from any 2D or volume electron microscopy (volume EM) dataset is an  
13 unsolved computational challenge. Current deep learning (DL) models are trained within limited  
14 contexts, restricting their widescale utility and potential as a universal or generalist solution for  
15 mitochondrial segmentation. To address this, we amass a highly heterogeneous  $\sim 1.5 \times 10^6$   
16 unlabeled cellular EM image dataset and a  $\sim 22,000$ , partially crowdsource-labeled,  
17 mitochondrial instance segmentation dataset. We release MitoNet, a DL model trained on these  
18 data, which performs well on new and challenging volume EM benchmarks. An accompanying  
19 Python package and napari plugin, called empanada, can be used for efficient training, inference,  
20 and clean-up of instance segmentations on EM images.

21

22 **Keywords**

23 Volume EM, segmentation, deep learning, electron microscopy, Panoptic, benchmark, image  
24 dataset, crowdsourcing

25

## 26 **Introduction**

27

28 Electron microscopy (EM) reveals 2D snapshots of cellular and subcellular ultrastructure at  
29 unrivaled resolutions, and more recent volume EM approaches extend these into the third  
30 dimension<sup>1,2</sup>. Technological advances in volume EM have dramatically increased the size of  
31 volumes that can be interrogated, most notably in connectomics<sup>3-5</sup>. Developing meaningful  
32 quantitative insights from EM data often requires the segmentation of features of interest. For  
33 these large neuronal datasets, machine learning (ML) or deep learning (DL) based tracing  
34 algorithms have helped generate detailed wiring diagrams<sup>6-10</sup>. Similar DL approaches have also  
35 provided insights into a variety of sub-cellular structures in other systems<sup>11-15</sup>.

36

37 As one of the most ubiquitous and morphologically complex organelles in biology<sup>16-18</sup> and a  
38 critical player in cellular physiology<sup>19-21</sup> and pathological processes<sup>22-24</sup>, mitochondria are  
39 frequent targets of analyses. Mitochondria have extraordinarily variable sizes, shapes,  
40 distributions and intra-organellar structures, yet they are instantly recognizable by their  
41 ultrastructure. This suggests that a universal DL model that accurately and precisely recognizes  
42 individual mitochondria in any given EM image should be possible.

43

44 Current approaches largely take the following strategy: a region of interest (ROI) from a dataset  
45 is chosen for dense manual segmentation, a model is trained on this ROI and then inference is  
46 run on the larger dataset, often followed by some manual “polishing”<sup>6,7,11,13,25,26</sup>. This strategy  
47 can lead to visually impressive results<sup>11,27</sup>; however, the constrained contexts presented during  
48 model training are one reason why such models have failed to generalize. As a result,  
49 segmentation quality drops when the models are presented with unseen cell and tissue types,  
50 sample preparation and imaging protocols, or even in some cases, regions of a dataset spatially  
51 distant from the training ROI<sup>11,13,28</sup>. Poor generalization limits the usefulness of models, as  
52 unfamiliar datasets require revisiting the cycle of manual annotation, model training,  
53 hyperparameter tuning, and prediction updating. Achieving good generalization is a challenging  
54 task. Mitochondria are present in nearly all eukaryotic cells such that the landscape of cellular  
55 contexts that a generalist segmentation model must account for is immense. This challenge

56 fundamentally distinguishes mitochondrial segmentation from other tasks such as tracing  
57 neurites or synapses that exist in a single tissue context (e.g., brain).

58

59 There are several publicly available datasets with segmented mitochondria from a narrow range  
60 of tissues: MitoEM,<sup>26</sup> Perez et al.,<sup>29</sup> Lucchi++ and Kasthuri++<sup>25</sup> are from brain tissue, Guay et  
61 al.<sup>30</sup> from human platelets, UroCell<sup>13</sup> from urinary bladder and Heinrich et al.<sup>11</sup> from three kinds  
62 of *in vitro* cells (HeLa, Jurkat and macrophage). Only one of these datasets (MitoEM) includes  
63 instance segmentations (i.e., where each mitochondrion is assigned a different label). We  
64 hypothesized that sparse 2D instance segmentations from an eclectic set of EM images would  
65 more effectively expand the range of contexts as compared to dense volumetric segmentation.  
66 Moreover, instance segmentation can unlock methods for the quantification of mitochondrial  
67 morphologies<sup>31-34</sup>, networks<sup>18,35</sup>, and fusion and fission dynamics<sup>36,37</sup>, for which semantic  
68 segmentation is insufficient.

69

70 Here, we have curated a heterogeneous, non-redundant, information-rich and relevant unlabeled  
71 EM image dataset (at  $\sim 1.5 \times 10^6$  images, the largest of its kind to our knowledge), called  
72 *CEM1.5M*, for use as a database from which to sample images for mitochondrial segmentation.  
73 Through the unification of existing labeled datasets and crowdsourced annotations of images  
74 from CEM1.5M, we have created a similarly diverse labeled image dataset called *CEM-MitoLab*  
75 for training ML/DL models. *MitoNet* is the model resulting from self-supervised pre-training on  
76 CEM1.5M followed by supervised training on CEM-MitoLab. We show that MitoNet  
77 outperforms other candidate datasets when tested on new and challenging benchmarks (we also  
78 share these benchmarks). Finally, in line with our overall mission is to democratize these efforts,  
79 we have created a Python package and napari plugin called *empanada*, which allows easy model  
80 training and inference as well as prediction clean-ups for MitoNet and any other ML/DL models.

81

## 82 **Results**

83

### 84 *Dataset Collation*

85

86 The first step in creating this resource was the generation of a database of unlabeled EM images  
87 of cells and tissues both for self-supervised model pre-training and as a source for sampling  
88 images for mitochondrial annotation. We collected a total of 463 volume EM datasets, of which  
89 352 were produced in-house at the Center for Molecular Microscopy (CMM) and 111 were  
90 generated and publicly deposited by external sources. Datasets larger than 5 GB were randomly  
91 cropped into 320 cubes of 256x256x256 (equaling 5 GB of unsigned 8-bit voxels) to limit their  
92 overrepresentation. Smaller datasets were kept at their original dimensions. In total, this yielded  
93 15,152 ROIs, corresponding to 338 GB. To these we added 5,390 2D EM images acquired at  
94 comparable pixel samplings (traditional TEM and STEM images of stained and resin-embedded  
95 biological samples), of which 1,738 images were from CMM, 2,261 were from the NCI electron  
96 microscopy lab and 1,391 were from external sources. Lastly, 27 video files of volume EM data  
97 from online publications were incorporated. Metadata and appropriate attribution were recorded,  
98 where possible, for all datasets (**Supplementary File 1**). We then applied the data preparation  
99 and curation pipeline previously developed in our work on the CEM500K dataset<sup>38</sup> to generate  
100 approximately  $1.5 \times 10^6$  2D image patches of 224x224 pixels. Patches from isotropic voxel  
101 datasets were derived from xy, xz and yz planes. The curation pipeline removed near-duplicate  
102 patches within each dataset before a neural network classified patches as “informative” or  
103 “uninformative”, the latter of which were discarded.

104

105 Of the combined 490 volume and video datasets, we selected 478 for annotation. The excluded  
106 volumes were those with pixel sizes greater than 40 nm or severe artifacts that likely would have  
107 made accurate annotation impossible. 20 of the volumes had 2D or 3D ROIs with mitochondrial  
108 instance segmentations (13 externally sourced; seven from CMM). The 3D segmentations were  
109 cropped into 2D patches and combined with 3,289 previously generated in-house segmentations  
110 of 2D data to form the “legacy” portion of the supervised dataset (see **Materials and Methods**).  
111 For all the remaining volumes, which had no corresponding mitochondrial annotations, we  
112 sampled patches for later manual segmentation. The overall curation process is outlined in

113 **Figure 1a.** Even with the 5 GB cap, the number of patches derived from each dataset within  
114 CEM1.5M varied significantly (**Figure 1b**) such that a naïve random sampling would have  
115 resulted in drastically oversampling the largest ones. Therefore, when picking annotation targets,  
116 we chose a maximum of 15 random patches from every dataset. For large and heterogeneous  
117 datasets this very sparse sampling likely misses some unique cellular contexts. However, we  
118 decided that for testing our hypothesis and the release of these resources, this level of sampling  
119 would adequately represent the data landscape while avoiding the time and labor cost of denser  
120 annotation. For the 2D images in CEM1.5M, we circumvented unequal sampling by coarsely  
121 grouping sets of 2D images together by known publication or imaging project (see **Materials**  
122 **and Methods**). This resulted in the creation of 83 groups of 2D EM images. To compensate for  
123 the possibility that groups may each represent multiple biological contexts, we selected a  
124 maximum of up to 25 instead of 15 random patches.

125  
126 At the end of data collation, we had 1,494,389 image patches for self-supervised pre-training,  
127 and for supervised training, nearly 15,897 previously annotated images from legacy data and  
128 5,841 images set aside for crowdsourced annotation. Unlike CEM1.5M and legacy data, which  
129 were significantly imbalanced toward a few large datasets, the images set aside for annotation  
130 almost evenly represented every volume EM dataset. During model training, weighted sampling  
131 from datasets was used to correct for imbalance in the combined legacy and crowdsourced data,  
132 see **Figure 1b, Materials and Methods**). The total 21,738 annotated images (of various sizes,  
133 **Supplementary Figure 1a**) that constituted CEM-MitoLab contained 134,812 mitochondrial  
134 instances and represented myriad pixel resolutions, imaging techniques, sample preparation  
135 protocols, cells, tissues, and organisms (**Figure 1c-f, Supplementary Figure 1b**).

136  
137 Our dataset consists exclusively of 2D images and favors a broad but superficial sampling of  
138 very many cellular contexts. **Supplementary Figure 1c** shows a random sample of patches from  
139 the Heinrich et al.,<sup>11</sup> and MitoEM<sup>26</sup> datasets, revealing a similar appearance across images. The  
140 mitochondria also showed little variation in contrast (**Supplementary Figure 1d**), as may be  
141 expected with the standardized sample preparation and imaging techniques used by these groups.  
142 By eschewing 3D segmentation strategies, we were able to quickly annotate widely, building a  
143 significantly larger and more heterogeneous dataset than the current alternatives. As a resource,

144 the CEM1.5M dataset can be used to build similarly diverse labeled datasets for other  
145 downstream segmentation tasks.

146

### 147 *Crowdsourced Annotation*

148

149 We were inspired by the citizen science project Etch-a-cell<sup>15</sup> on the Zooniverse platform, in  
150 which thousands of volunteers annotated organelles like the nuclear envelope, mitochondria and  
151 endoplasmic reticulum (ER) in a single or small number of volume EM reconstructions. To  
152 create crowdsourced segmentations for mitochondria in CEM-MitoLab, we created a “private”  
153 project on Zooniverse, where 34 students recruited from local high schools were briefly trained  
154 to identify and annotate mitochondria in diverse and challenging EM images. **Supplementary**  
155 **Figure 1c** demonstrates the difficulty of the task: The appearance of a mitochondrion depends  
156 strongly on cell and tissue type, sample preparation and imaging approach. To give some 3D  
157 context and help resolve ambiguous images and edge cases, we presented images extracted from  
158 volumetric datasets as short “flipbooks” of five consecutive slices. For this task students were  
159 instructed to only annotate the middle slice of the flipbook (screenshots of the user interface  
160 shown in **Supplementary Figure 2a**). We also implemented three controls to enhance the  
161 quality of annotations. First, a retirement limit of ten was set such that each image was annotated  
162 independently by ten students, and not shown again. These ten annotations were combined to  
163 form a consensus instance segmentation (see **Materials and Methods, Supplementary Figure**  
164 **3**). Second, we asked annotators to rate their confidence in their annotation on a scale from 1 to 5  
165 (where 1 was not at all confident and 5 was very confident). Third, all consensus annotations  
166 were reviewed by at least two experienced CMM researchers to create the final ground truth  
167 segmentation.

168

169 For this project, nine sets of 500-1000 images were uploaded to the Zooniverse platform over a  
170 period of six months. These sets were organized into three groups with each group containing  
171 patches from different 2D and 3D datasets. Group 1 contained a mixture of in-house and external  
172 volume EM datasets, Group 2 contained in-house and NCI 2D datasets and Group 3 exclusively  
173 contained in-house volume EM datasets acquired since the launch of the project. As a baseline,  
174 and to test the annotation interface, the first two sets of images (referred to as Group 1a) were

175 annotated by seven experienced EM researchers, with an image retirement limit of five. The  
176 remaining three sets of images in Group 1 (referred to as Group 1b) along with Group 2 and  
177 Group 3 were annotated exclusively by students.

178  
179 We found that the consensus annotations for mitochondria with clearly defined outer membranes  
180 and cristae were often high-quality, especially at the pixel-level (**Figure 2a**). 39.6% of consensus  
181 annotations required no corrections upon expert review, 12.5% required cosmetic pixel-level  
182 corrections and the remaining 47.9% required some combination of pixel-level, false positive  
183 and false negative corrections. Among this last set, the average correction added 3.7 false  
184 negatives and removed 0.4 false positives per image. The total number of corrections for each  
185 group of images are tabulated in **Supplementary Figure 2b**. Annotations in need of the most  
186 corrections were often the result of systematic gaps in the annotators' knowledge. Such errors  
187 were manifested as annotations with strong mutual agreements which nevertheless were far from  
188 the expert-reviewed ground truth (**Supplementary Figure 2c**). Nevertheless, student annotation  
189 performance as a whole improved over the course of the project. The students' first annotations  
190 had much lower F1 scores measured at an intersection-over-union (IoU) threshold of 0.5  
191 (F1@50) than experts (**Figure 2b**). By Group 3, the median student F1@50 scores had risen  
192 from 0.57 to 0.72, and impressively, the top 50% of students achieved F1@50 scores that were  
193 within the range of experienced annotator scores for Group 1a. This improvement occurred  
194 despite the introduction of previously unseen cellular contexts in each group and may be  
195 attributed to the heterogeneous data encountered earlier in the project. The improvements were  
196 not uniform for all students and this was reflected by a widening range in annotator performance  
197 with each new group of images. Seven of the 29 annotators (five dropped out before the last  
198 group of images) actually did worse over time (**Figure 2b**).

199  
200 Despite the variability in annotator quality, consensus annotations were always near or above the  
201 75<sup>th</sup> percentile of annotators (**Figure 2b**). This underscores the effectiveness of acquiring  
202 multiple independent annotations and applying a robust consensus algorithm. Although there was  
203 a slight upward trend with increasing the limit for students, the gains in annotation quality  
204 appeared to start leveling off after five or six regardless of the group of images being annotated  
205 (**Figure 2c**). The lower limit of five for experienced annotators was sufficient to reach nearly



206 perfect annotations, with consensus scores reaching 0.9. With a retirement limit of ten for the  
207 students annotators, we observed that the best consensus annotations on a per-image basis were  
208 created by setting a vote threshold of five (i.e., at least five annotators must have agreed on the  
209 label of a pixel for that label to be used in the consensus) (**Figure 2d**). This vote threshold also  
210 achieved a reasonable balance between true positive, false positive and false negative detections  
211 (**Supplementary Figure 2d**). While this vote threshold was set after evaluating results of Group  
212 1, we subsequently observed that F1@50 over all mitochondrial instances that were annotated by  
213 students, instead of over all images, was marginally higher at a threshold of three (**Figure 2d**).  
214 However, even with a vote threshold of five for all consensus annotations, our approach created  
215 each instance segmentation as accurately as possible, independent of number of mitochondria per  
216 image.

217

218 Lastly, we hoped that self-reporting of annotation confidence could be used to filter out low-  
219 quality predictions, instead we found this factor to be a poor proxy for annotation quality. While  
220 there was an increase in average F1@50 with increasing confidence scores, there was also a wide  
221 variance. Thus discarding “low confidence” annotations would have thrown out nearly as many  
222 good as bad annotations. (**Figure 2e**). There was only a weak correlation ( $r=0.322$ ) between an  
223 annotator’s average reported confidence score and that annotator’s average annotation quality  
224 (**Figure 2f**), suggesting different levels of baseline confidence within the student cohort. For  
225 larger crowdsourced datasets where proofreading every annotation is infeasible, confidence  
226 scores may still be useful as a guide for identifying annotations most likely to require correction.  
227 Surprisingly, we also observed that there was no correlation ( $r=-0.096$ ) between the number of  
228 annotations a student completed and their average F1@50 score (**Figure 2g**). These findings  
229 highlight the difficulty of gathering annotations from the public even with a motivated and  
230 trained cohort. Future crowdsource projects may benefit from targeted coaching or  
231 exclusion/weighting of lower-performing annotators. Time and resources must be invested to  
232 teach the skills necessary for handling such tasks, and still, reliable and high-performing  
233 annotators can only be identified after expert review and corrections over several rounds.

234

235 *Benchmark Datasets*

236



237 To assess how well models trained on the collected mitochondrial data might generalize to future  
238 unseen images, we withheld six instance segmented volumes from the above pipelines. These  
239 volumes were chosen to encapsulate a few different cellular contexts, mitochondrial  
240 morphologies, and sample preparation protocols. Crucially, they also represented varying levels  
241 of difficulty to help identify deficiencies in the training dataset, model architectures and  
242 postprocessing algorithms. The six volumes, five of which were not previously annotated,  
243 included conventionally fixed, heavy metal stained and resin-embedded samples (different  
244 sample preparation protocols, and imaged independently) of fly<sup>39</sup> and mouse brain<sup>25,40</sup> tissue,  
245 glycolytic muscle tissue<sup>35</sup>, mouse salivary gland, and a HeLa cell. The sixth volume was a high-  
246 pressure frozen (HPF), freeze substituted *C. elegans* embryo specimen. The first three of these  
247 were generated externally and the last three were generated in-house. Representative 2D images  
248 and 3D renderings of mitochondria from each dataset are shown in **Figure 3a**. The mouse brain  
249 volume was the test set from the commonly used Lucchi++ benchmark (we converted the  
250 semantically segmented mitochondria to instance segmentation, see **Materials and Methods**).  
251 This benchmark was useful to calibrate performance because there were established results for  
252 comparison. Importantly, unlike prior research on this dataset, the entire Lucchi++ dataset was  
253 excluded from our training data. Aside from the Lucchi++ benchmark, which was imaged at  
254 isotropic 5 nm voxel resolutions, we intentionally chose or resampled the other volumes to have  
255 intermediate resolutions (10-25 nm) in line with the most common resolutions in the training  
256 dataset. In this range, mitochondria are generally still easy to identify on the whole but may be  
257 small.

258  
259 Each of the new benchmark volumes presented unique challenges. The mitochondria in the fly  
260 brain volume were morphologically simple but appeared in two distinct variants: lightly stained  
261 with poorly defined cristae and darkly stained with well-defined cristae (**orange and blue  
262 arrows respectively**). The HeLa cell volume, in addition to being cluttered with subcellular  
263 features such as Golgi, ER and a variety of vesicles, had areas of localized heavy metal  
264 precipitation from sample preparation (**green arrow**). The *C. elegans* embryo volume has a  
265 mixture of two mitochondrial morphologies that are difficult to segment: small puncta and  
266 skinny tubules, with a small median cross-sectional radius of six voxels (**Figure 3b**). Moreover,  
267 this volume also contained membranous organelles<sup>41</sup> that might induce false positive detections

268 as they appear similar to mitochondria with swollen cristae at these resolutions (**yellow arrow**).  
269 Finally, overall contrast was relatively lower, as expected for high-pressure freezing (HPF) and  
270 freeze-substitution used in the sample preparation protocol. The glycolytic muscle volume had a  
271 relatively uncluttered background but more complex and elaborate branched morphologies.  
272 About a third of the mitochondria had more than one branch and ten had four or more long  
273 branches, with the most branched mitochondrion having 11 (**Figure 3b**). The salivary gland  
274 volume was by far the most challenging. Besides the unusual tissue context, the mitochondria  
275 were weakly stained relative to the cytoplasm, which was packed with ER. Many mitochondria  
276 were also flat or bowl-shaped and tightly pressed against and around acini (**red arrow**).  
277 Especially difficult for accurate instance segmentation, mitochondria were closely packed  
278 together with the boundaries of over 75% being within just five voxels of the next nearest  
279 mitochondrion's boundary (**Figure 3b**).

280

### 281 *Instance Segmentation Algorithm*

282

283 For 2D instance segmentation of mitochondria, we adopted the Panoptic-DeepLab<sup>42</sup> (PDL)  
284 architecture. PDL is an encoder-decoder architecture, similar to the standard U-Net<sup>43</sup>. As is  
285 common for biological images, PDL employs a bottom-up approach to instance segmentation. A  
286 key advantage of bottom-up algorithms is that they can segment an arbitrarily large number of  
287 objects within a field of view, in contrast to top-down algorithms like Mask R-CNN<sup>44</sup> or  
288 Mask2Former<sup>45</sup> that set limits on the number of objects. We trained PDL models to infer  
289 mitochondrial semantic segmentations, centers and per-pixel x and y offsets from each center  
290 (**Figure 4a**). To create semantic segmentations at resolutions higher than the input image  
291 resolution, we also employed the PointRend<sup>46</sup> module. PointRend iteratively interpolates the  
292 segmentation, identifies the most uncertain pixels, and then reevaluates the label for those pixels  
293 to refine the segmentation (**Supplementary Figure 4**). Thus PointRend allows the model to  
294 accept images that have been downsampled to lower resolutions – preferably in the 10-20 nm  
295 range to match our labeled dataset – and output segmentations with crisp boundaries at the  
296 original resolution without the need for a resolution-specific model architecture. Finally, the  
297 semantic segmentation, offsets and object centers were merged into an instance segmentation  
298 (**Figure 4a**) via a simple postprocessing algorithm (see **Materials and Methods**).

299

300 Next, we generalized the 2D instance segmentation algorithm to handle volume EM data. As  
301 implemented, PDL did not track objects through an image stack. Instead, we matched objects  
302 across consecutive slices by computing IoU scores between all pairs of instances and applying  
303 the Hungarian algorithm<sup>47</sup>. We observed that long mitochondrial instances in 2D were  
304 sometimes erroneously split into multiple fragments. Since the Hungarian algorithm assumes a  
305 1-to-1 matching, these fragments were left unmatched with an object in the preceding slice. By  
306 computing intersection-over-area (IoA) scores we were able to identify fragments that were  
307 enclosed by a larger object on the preceding slice. These were then merged to the label of that  
308 larger object (**Figure 4b**). Since the matching algorithm relied only on consecutive slices, a false  
309 negative detection on even a single slice could break the connectivity of that object in 3D. To  
310 correct this, we used median within a short stack of the last 3, 5 or 7 recorded semantic  
311 segmentation probabilities (**Figure 4c**) to infer the correct segmentation for the current slice. As  
312 a final step, matching was performed in the reverse direction through the stack. This was  
313 essential to correctly merge branched mitochondria (**Figure 4d**).

314

315 Optionally, for isotropic-voxel volumes, inference may be performed equivalently on images  
316 from the xy, xz and yz planes. Following our previous work<sup>48</sup>, we refer to this as ortho-plane  
317 inference, although the same idea has been applied elsewhere<sup>15,49</sup>. In this case, the outputs of  
318 ortho-plane inference were three independent instance segmentations. We merged these into a  
319 single consensus instance segmentation by applying the same algorithm used during  
320 crowdsourcing (**Figure 4e**). In all experiments, unless otherwise noted, we applied ortho-plane  
321 inference to isotropic-voxel volumes. Other model architectures and postprocessing algorithms  
322 like watershed<sup>50</sup> could likely work comparably with the architecture presented here. Our design  
323 decisions were heavily influenced by computational efficiency. We used simple run-length  
324 encoding compression to represent all 2D and 3D instance segmentations. As a result, forward  
325 and backward matching of instances and the consensus algorithm, which must process three  
326 complete volumetric instance segmentations, was run on large datasets using minimal compute  
327 resources. Such considerations are critical for ensuring that this tool can be adopted widely  
328 within the EM community.

329

330 *Model training and evaluation*

331

332 Before training any models on the mitochondrial segmentations, we pretrained a ResNet50<sup>51</sup>  
333 model on CEM1.5M using the SwAV<sup>52</sup> self-supervised learning algorithm. This pretrained  
334 model was employed as the encoder network in our experiments. Our best performing PDL  
335 model was trained for 120 epochs on CEM-MitoLab (see **Materials and Methods**). Our results  
336 showed that our model, MitoNet, was able to segment a variety of mitochondrial instances  
337 accurately in both 2D and 3D (**Figure 5a, b**). Model performance was best on the brain tissue  
338 datasets (fly brain and Lucchi++) with both semantic IoU and F1@75 scores of about 0.9 and  
339 above (**Figure 5c**). Detailed performance metrics of MitoNet over all benchmarks are included in  
340 Table 1. The high contrast, simplicity of mitochondrial morphologies, and relative homogeneity  
341 of tissue ultrastructure in these datasets presented an easier challenge. The model also correctly  
342 detected both the lightly and darkly stained variants of mitochondria in the fly brain volume as  
343 described above. Strikingly, the F1@75 score of 0.88 achieved on the Lucchi++ test set by our  
344 generalist model matched the result from models that were trained exclusively on the Lucchi++  
345 training set<sup>53</sup>. Moreover, we observed that all false negative detections at an IoU threshold of 0.5  
346 were from small instances that were truncated at the edge of the volume (data not shown).

347

348 MitoNet performance on the HeLa and glycolytic muscle benchmarks was also strong even  
349 though these datasets were more difficult. While semantic IoU scores still held within the 0.8-0.9  
350 range, F1@75 scores were 0.50 and 0.60 respectively. For the HeLa benchmark, the model  
351 successfully ignored most of the intracellular clutter that was expected to be challenging (**Figure**  
352 **5a**). Mitochondria in the glycolytic muscle dataset had clearly defined membranes and cristae  
353 that should make them easy to distinguish. That said, model performance was surprisingly good  
354 given that no images of glycolytic muscle were present in the training dataset at all and only a  
355 handful of images were from muscle tissue (mitochondrial ultrastructure is significantly different  
356 depending on the oxidative state of muscle)<sup>54</sup>. The lower F1 scores observed for instance  
357 segmentation, despite good semantic segmentation, were evidence that individual mitochondria  
358 were harder for our model and postprocessing to distinguish in these datasets. At an IoU  
359 threshold of 0.5, we observed that over 75% of the false negatives in the HeLa volume and about  
360 50% in the glycolytic muscle volume occurred for mitochondria within five or fewer voxels of

361 their nearest neighbor (**Supplementary Figure 5**). **Figure 5b** shows examples of the over  
362 merging errors that our method was prone to make. It should be noted, however, that the model  
363 still correctly detected 78% of the closely apposed mitochondria in the HeLa volume and 52% in  
364 the glycolytic muscle, and performed well with branched mitochondria. As an example, aside  
365 from one minor split, the model and postprocessing correctly handled a heavily branched  
366 mitochondrion in the glycolytic muscle volume (**Figure 5b**, blue arrow).

367  
368 The *C. elegans* dataset presented a number of challenges for our model. The mitochondria were  
369 low contrast, and small and tightly packed together; this was made worse by the low pixel  
370 sampling (24 nm). To get the best performance on this dataset we found that it was necessary to  
371 use a lower vote threshold of only one plane for ortho-plane inference. With this lower vote  
372 threshold, the IoU score increased to 0.60 from 0.42, though the F1@75 score was lower at 0.35  
373 (still a substantial increase from 0.19). An IoU threshold of 0.5, the model failed to accurately  
374 detect any mitochondria at that were smaller than 1,000 voxels, or  $\sim 0.25 \mu\text{m}^3$ , in size  
375 (**Supplementary Figure 5**); such small instances accounted for about 25% of all false negatives.  
376 The model also performed slightly worse on mitochondria with lower contrast (mean grayscale  
377 of correctly identified mitochondria (True Positive), 75.9; wrongly missed mitochondria (False  
378 Negative), 70.5,  $p=3 \times 10^{-4}$ ). Supplementary Table 1 lists the mean mitochondrial parameters  
379 corresponding to TP and FN detections across all benchmarks. Again, closely apposed instances  
380 accounted for over 75% of all false negatives. A cluster of a few tightly packed mitochondria  
381 could induce multiple false negatives and false positives – and rapidly decrease F1 scores – even  
382 when the voxel-level segmentation appeared quite good (**Figure 5b**, black arrow). The model  
383 did manage, however, to mostly avoid erroneously labeling the so-called membranous  
384 organelles, but occasionally labeled some vesicles as mitochondria (**Figure 5a**).

385  
386 On the most challenging of the benchmarks, the salivary gland volume, MitoNet achieved an IoU  
387 score of just 0.1 and consequently negligible F1 scores. The unusual appearance and  
388 morphologies of the mitochondria and abundance of ER made this benchmark extremely  
389 difficult. Therefore, here we tested the ability of the model after minimal fine-tuning, i.e., after a  
390 second round of training on a small subset of the volume's data. We extracted a small fraction of  
391 ground truth data, 64 random patches of 224x224 pixels from this salivary gland dataset ( $\sim 0.2\%$

392 of the total volume). Even with a very brief finetuning step of 500 iterations (~5 minutes on our  
393 system), we achieved dramatically improved semantic segmentation quality with IoU increasing  
394 to 0.65 (**Figure 5d**). F1@50 scores also improved, from 0.04 to 0.22. The lower F1 score overall  
395 was because, uniquely among these benchmarks, a large fraction of the mitochondria in this  
396 dataset were part of a network of closely apposed instances; our model and postprocessing  
397 merged nearly all of these mitochondria into a single large instance (**Figure 5a, Supplementary**  
398 **Figure 5**). However, we underscore an important point: Even when the generalist model fails on  
399 a given dataset, it is still a strong starting point for training a specialized model, and can succeed  
400 with a modest number of examples and compute power. The main challenges that remain for  
401 these benchmarks appear to be the handling of small objects and tightly packed instances  
402 (Supplementary Table 1). We found that instance branch length, measured in voxels, was not a  
403 significant factor that led to false negative detection (**Supplementary Figure 5**), meaning that  
404 MitoNet and our 3D postprocessing algorithms were able to track mitochondrial instances over  
405 many slices of volume EM datasets without losing connectivity.

406

407 Finally, we directly probed the efficacy of CEM-MitoLab against other training datasets by  
408 measuring performance of models across all benchmarks except the salivary gland volume. Since  
409 each dataset included a different number of patches, for this experiment we trained all models for  
410 approximately 10,000 iterations to control bias toward larger training datasets (the 120 epochs  
411 used for MitoNet was the equivalent of about 40,000 iterations). The labeled datasets for training  
412 included MitoEM<sup>26</sup> and Heinrich et al.<sup>11</sup>, which were the largest and most heterogeneous  
413 publicly available datasets, respectively, plus our legacy dataset and the crowdsourced dataset  
414 both with and without proofreading. We found that the Heinrich et al. dataset was not useful for  
415 our benchmark volumes, likely because of its small size and limited breadth. The model trained  
416 on it achieved F1 scores of zero at all IoU thresholds and the highest IoU score was  $1 \times 10^{-3}$  on  
417 the Lucchi++ benchmark. The model trained on MitoEM achieved respectable – but expected  
418 since they were similar neuronal data – F1@75 scores of 0.86 and 0.75 on the fly brain and  
419 Lucchi++ volumes, but scores of 0, 0.07, and 0.01 on the *C. elegans*, HeLa cell and glycolytic  
420 muscle volumes. The average performance metrics over all benchmarks for MitoNet versions  
421 trained on various annotated datasets is shown in Table 2.

422

423 Our legacy dataset, described above, was 5x larger than the crowdsourced dataset and reasonably  
424 heterogeneous with data from 17 volumes, over 500 TEM images and over 2,000 small 2D  
425 patches from CEM500K. Still, we observed that the model trained on this dataset had slightly  
426 lower F1 and IoU scores than the model trained on the expert proofread crowdsourced data  
427 (which excluded images in Group 1a). This surprising finding underscores how critical data  
428 diversity is to training generalist models. A dataset of nothing but small 2D patches sparsely  
429 sampled from numerous datasets was more effective on our benchmarks than any of the much  
430 larger but somewhat less heterogeneous datasets. As a corollary to this finding, we observed that  
431 the student consensus annotations, despite over 50% requiring some expert correction, yielded a  
432 more general model than training on the MitoEM dataset. This suggests that even noisy and  
433 inaccurate, but heterogeneous, labeled data contains enough training signal for a model to learn a  
434 better representation of mitochondrial ultrastructure than could be achieved from large, high-  
435 quality but homogeneous data.



## 436 Discussion

437

438 In this paper we have reported several resources for the growing volume EM community: a  
439 highly heterogeneous  $\sim 1.5 \times 10^6$  unlabeled cellular EM image dataset (CEM1.5M), a well-  
440 described, large and heterogeneous dataset with instance labeled mitochondria (CEM-MitoLab),  
441 a model trained on this dataset (MitoNet), a set of diverse benchmarks to test this and future  
442 models, and a Python package and napari plugin (empanada) for immediate use of MitoNet.  
443 Increases in throughput enabled by technological advances and the application of volume EM  
444 techniques to a wider range of biological systems have exacerbated the segmentation and data  
445 analysis bottleneck in the field. Recent DL-based results have been spectacular in narrow  
446 contexts, but researchers risk getting stuck in the cycle of “manually label and train a model on a  
447 sub-volume, run inference and polish on the full volume”. The models that result from such  
448 workflows generalize poorly to unrelated datasets and are usually obsolete as soon as the  
449 relevant segmentation is completed. With the ultimate aim of breaking out of this cycle and  
450 creating reusable tools that benefit the community, we show that very broad but shallow  
451 sampling of cellular contexts is a robust strategy to create general organelle segmentation  
452 models. We present these datasets for use as-is or for future expansion or versioning for  
453 specialized tasks. To this end, the organization and appropriate description of datasets is crucial.  
454 We have created a simple and practical implementation of REMBI protocols<sup>55</sup> in the form of a  
455 spreadsheet (**Supplementary File 1**) and have filled in metadata fields at minimum  
456 corresponding to image descriptors and basic biological information, so that users can search this  
457 release or future iterations of the dataset using metadata terms.

458

459 We made the important decision to forego 3D approaches, knowingly trading accuracy for  
460 generalization and efficiency. Native 3D models are expected to perform better for instance  
461 segmentation because of their expanded spatial context. However, it is exceedingly time-  
462 consuming to generate sufficient annotation datasets to adequately train a model. For example,  
463 our crowdsourced dataset of  $\sim 6,000$  2D labeled images is equivalent to roughly 30 3D labeled  
464 images of the same size (224 pixels to a side). Choosing to create such a 3D dataset would have  
465 left a great variety of contexts unsampled and would have excluded thousands of TEM and  
466 STEM images. Here we attempted to thread the needle. We collected annotations in 2D but gave

467 annotators the extra context of a flipbook. We ran model inference in 2D but developed instance  
468 matching, median filtering, and ortho-plane techniques to propagate and incorporate 3D  
469 information. Moving beyond 2D will likely be necessary to achieve human-level annotation  
470 quality on some volumetric datasets. Indeed, one use-case of MitoNet is that it can be  
471 incorporated into human-in-the-loop workflows to rapidly produce 3D segmentations needed to  
472 train this next-generation of models.

473  
474 Regardless of dimensionality, our results demonstrate that heterogeneity is a central  
475 characteristic for a training dataset. The version of MitoNet trained on noisy and often inaccurate  
476 crowdsourced annotations from students was measurably better on our benchmarks than the  
477 equivalent model trained on the much larger and expertly labeled MitoEM dataset (**Figure 5d**).  
478 Still, proofreading the annotations for accuracy was necessary to achieve our best results. Getting  
479 high-quality crowdsourced segmentations without expert intervention is challenging, even with  
480 powerful tools like Zooniverse. Accumulating the knowledge necessary to recognize  
481 mitochondria across many tissues, organisms and sample preparation protocols takes time and  
482 training. Relatively few experienced annotators (3-5) are enough to create strong consensus  
483 segmentations, meaning that broader expert participation in shared segmentation efforts would  
484 be beneficial to the field.

485  
486 The value of training data heterogeneity is only apparent when the test data is also  
487 heterogeneous. There are few volume EM benchmarks, and those derived from connectomics  
488 data are all quite similar to each other; possibly the best known of these, Lucchi++<sup>25,40</sup> has now  
489 been mined to the point that it is difficult to track improvements in DL performance<sup>25,53,56</sup>, and  
490 until this report, only one benchmark, MitoEM, provided instance segmentations. Our  
491 benchmark with six instance segmented volumes aims to correct these deficiencies. It is still just  
492 a small sampling of the entire cellular landscape, but appears to be the most stringent test  
493 available, with a range of mitochondria, contexts, quality and overall difficulty. We suggest that  
494 future benchmarks should comprise relatively small ROIs from many volume EM datasets to  
495 best test generalization. Training and test datasets must also evolve to accurately measure  
496 progress of automated solutions and prevent misleading reports of success.

497

498 Finally, at least within the volume EM field, we are acutely aware of the gap between research  
499 groups that have ample resources and computational expertise, and smaller labs that do not. Most  
500 groups deal with small, discrete, and one-off 3D reconstructions, so it is important to have tools  
501 that are relatively easy to use and not compute heavy. We designed our Python package,  
502 *empanada*, and the corresponding napari plugin, with this in mind. *Empanada* and the MitoNet  
503 model are optimized for compute and memory efficiency and our plugin is easy to install and  
504 use. Additionally, it can run on consumer-grade laptops without GPUs or on HPC clusters with  
505 many. MitoNet can be incorporated into other established image analysis platforms and will  
506 ideally give users a better model that can be quickly deployed or finetuned to meet their  
507 segmentation needs. We did not focus on trying to get the absolute best architecture possible for  
508 MitoNet and we hope and expect others will supersede our results. Rather, we used an efficient  
509 architecture and postprocessing scheme that scales well to large images and images with very  
510 many objects, as would be expected for mitochondrial instance segmentation in EM.

511

512 Volume EM has been suggested to be in the midst of a “quiet revolution” in cell biology<sup>57</sup>. A raft  
513 of papers in connectomics and in cell biology have revealed insights into a variety of systems by  
514 enabling the high-resolution 3D imaging of cellular and subcellular features. These imaging  
515 techniques record ultrastructural information in a largely unselective manner, meaning that the  
516 data, once collected, need to be parsed out to extract features of interest for visualization and  
517 analysis. This step, segmentation, must be accurate and precise to faithfully represent the  
518 underlying biology and it must also be efficient to match the speed of data generation. Recent  
519 developments in DL approaches show great promise, yet these tools can be held back by the lack  
520 of large-scale and relevant data resources. In this report we directly address this problem as it  
521 pertains to universal segmentation of mitochondria in EM images. With an eye towards creating  
522 a universal mitochondrial model, we employ a strategy of sparse sampling of widely  
523 heterogeneous datasets and show that the resulting model, MitoNet, when trained on these data,  
524 yields promising results on challenging tasks. We release the resources to the community with  
525 the hope that continued work on this approach will expand the EM segmentation toolkit and  
526 further accelerate discoveries in this exciting field.

527

## 528 **Materials and Methods**

529

### 530 *Unlabeled dataset creation*

531

532 The expansion of CEM500K to create the CEM1.5M dataset followed the data standardization  
533 and curation protocols presented in our previous work<sup>58</sup>. External datasets were either  
534 downloaded in their entirety or, for large datasets stored online in next generation file formats  
535 (n5 or zarr), accessed either with the CloudVolume or fibsem-tools APIs. Any datasets larger  
536 than 5 GB were randomly cropped into 320 cubes of 256x256x256 (equivalent to 5 GB). When  
537 available, to ensure that the randomly chosen crops included cellular content and not empty  
538 image padding or resin, a low-resolution overview image volume of the dataset was downloaded  
539 and used to identify the extents of informative ROIs. Lastly, cellular EM images from videos  
540 were converted to mrc files after removing all frames that showed non-EM content. Metadata,  
541 and proper attribution, for each dataset following REMBI<sup>59</sup> standards is available in

### 542 **Supplementary file 1.**

543

544 In-house 2D EM images were collected from the National Cancer Institute's Electron  
545 Microscopy Laboratory database. The database included over  $2 \times 10^5$  TEM images. A sample of  
546 5,000 images with magnifications between 1000x (~16 nm) and 3000x (~6 nm) that excluded  
547 negative stain and immunogold label images was randomly selected. This sample represented the  
548 output of collaborations with 76 NIH investigators from over the last 12 years. Metadata for each  
549 image was limited. Therefore, images were grouped by investigator before further sampling.  
550 Additionally, seven more groups of 2D STEM images were added from previous in-house  
551 imaging projects; because metadata was available for these images they were grouped by  
552 biological context and not investigator.

553

### 554 *Zooniverse Workflow*

555

556 Our Zooniverse workflow closely approximated the Etch-a-cell project<sup>15</sup>. Patches in the  
557 CEM1.5M dataset extracted from volume EM images were reconstructed into short "flipbooks"  
558 (tif stacks of five consecutive images of 224x224), where each patch from the CEM dataset was

559 the center image (the adjacent patches were typically filtered out by the CEM deduplication  
560 pipeline). Before uploading to Zooniverse each flipbook had its 8-bit intensity range rescaled  
561 from 25 to 235 and was interpolated to a size of 480x480 for easier viewing. For 2D images,  
562 crops of 512x512 were used. Intensity was rescaled to the same range as the flipbooks but no  
563 resizing was performed.

564

565 The first two sets of images uploaded to Zooniverse (Group 1a) had an annotation retirement  
566 limit of five (i.e., every image was annotated independently by five people) and were annotated  
567 by a mixture of lab members familiar with cellular EM and inexperienced student annotators.  
568 Consensus annotations from these sets only used annotations from experts; the students'  
569 feedback on the project helped refine the Zooniverse tutorials and interface. For all remaining  
570 sets, which were annotated entirely by an expanded cohort of students, the retirement limit was  
571 set to ten. For the first two of these sets, 5-10% of images were annotated by a team of at least  
572 three EM experts. These “gold-standard” annotations were used to measure the performance of  
573 the student annotators and to provide them with training examples via a Google CoLab  
574 notebook. Later, as the students' annotations became more accurate, the non-proofread  
575 consensus annotations were shared. In addition to this, feedback via the Zooniverse message  
576 channel and a formal instruction session was used to review challenging examples and explain  
577 common mistakes.

578

579 *Consensus annotation algorithm*

580

581 The input to the algorithm was a set of  $\mathbf{N}$  annotations (the retirement limit) containing  $\mathbf{K}$   
582 mitochondrial detections. An undirected graph was initialized where each node corresponded to  
583 one of the  $\mathbf{K}$  detections. Pairwise bounding box IoU scores were calculated for all detections to  
584 form a  $\mathbf{KxK}$  matrix. For all pairs of detections with non-zero bounding box intersections, pixel-  
585 level mask IoU scores were calculated. Edges were added to the graph to connect detection  
586 nodes with mask IoU scores that exceeded a small threshold value of 0.1 (the same algorithm,  
587 when applied during ortho-plane inference, used a threshold of 0.01). The resultant connected  
588 components in the detection graph were processed independently to determine the consensus  
589 object instances.

590

591 Nodes in a connected component were organized into cliques where all detections within a clique  
592 had IoU scores greater than 0.75. An iterative algorithm was then applied to determine whether  
593 cliques should be merged or remain split. First, the clique whose detections shared the most  
594 edges with other cliques, i.e. the most connected clique, was selected (node C in Supplementary  
595 Figure 3 ii, A in 3 iii). Second, if any of the most connected clique's neighbors contained more  
596 detections, then the most connected clique was dissolved and its detections were pushed out to  
597 each of its neighbors (Supplementary Figure 3 iv). Otherwise, all the most connected clique's  
598 neighbors were dissolved and their detections were pulled in by the most connected clique  
599 (between B and D in Supplementary Figure 3 iv, and B and C into A in 3 v). These two steps  
600 were repeated until no cliques had outgoing edges. Each clique represented a segmented object  
601 instance. The detection masks within a clique were added together to form an image where each  
602 pixel had a value from 1 to  $N$  denoting the number of annotators who labeled it. A vote threshold  
603 of 3 when the retirement limit was 5 or 5 when the retirement limit was 10 was applied to create  
604 the final binary instance mask. In cases where there was weak instance-level consensus between  
605 annotators, the binary instance masks from separate cliques within the same connected  
606 component could have non-trivial overlaps with each other. If these overlaps resulted in IoU  
607 scores greater than 0.1 between binary instance masks, then those masks were combined into a  
608 single mask. In the final consensus instance segmentation, all non-zero binary masks were  
609 assigned new labels and merged. A schematic of this algorithm is shown in **Supplementary**  
610 **Figure 3**. In summary, this algorithm assumed that the most connected clique at each step  
611 roughly corresponded to a maximally merged instance. When one of this clique's neighbors  
612 contained more detections, this implied that more votes were in favor of splitting than maximal  
613 merging. Pushing the most connected clique to its neighbors ensured that no detections were  
614 deleted before being counted towards the final pixel-level majority vote. Conversely, when the  
615 most connected clique had the most detections, this implied that more votes were in favor of  
616 maximal merging and therefore all detections in neighboring cliques were pulled into the most  
617 connected clique.

618

619 *Proofreading*

620

621 Once all images in a set were retired, a consensus strength and instance segmentation were  
622 calculated for each. The consensus strength was the average F1@50 score of each individual  
623 annotation relative to the consensus instance segmentation. Lower consensus strengths indicated  
624 greater disagreement between annotators. Next, all images and instance segmentations were  
625 ordered by consensus strength and stacked into a single tif file for later proofreading. If the set  
626 used flipbooks, then the images and their consensus instance segmentations were resized from  
627 480x480 back to their original sizes. Padding was added as needed to ensure that all images in  
628 the stack had the same dimensions. Typically, the single proofreading stack was split into chunks  
629 of 40-50 images/flipbooks such that multiple experts could perform proofreading in parallel.  
630 Proofreaders were instructed to emphasize the correction of false positive and false negative  
631 detections over fine-grained instance boundary corrections. Annotations in each chunk of images  
632 were verified by a second proofreader and disagreements were discussed and resolved by at least  
633 three proofreaders. 3D Slicer<sup>60</sup> was used to visualize and correct annotations. The chunks of  
634 proofread images and annotations were again combined into a single large stack. Every image, or  
635 every third image for flipbooks, and corresponding instance segmentation was stored as a tiff  
636 image with any padding cropped out. Importantly, all annotations were passed through a  
637 connected components filter to guarantee that there were no disconnected instances.

638

### 639 *Training dataset creation*

640

641 The training dataset included all consensus annotations gathered from Zooniverse as well as the  
642 legacy data. The latter included annotations from publicly available mitochondrial segmentation  
643 benchmarks (Kasthuri<sup>25,61</sup>, Guay<sup>30</sup>, UroCell<sup>62</sup>, MitoEM<sup>26</sup>, Heinrich et al.<sup>11</sup> and Perez et al.<sup>29</sup>)  
644 and previous in-house projects. Of the benchmark datasets, only the MitoEM benchmark had  
645 individual instances labeled; instance segmentations for all others were generated manually after  
646 applying a connected components filter. In-house annotations for various unrelated projects  
647 included 11 volume EM image reconstructions (see **Supplementary File 1**) as well as 529 TEM  
648 images and 2,231 image patches from the CEM500K dataset. None of these images were derived  
649 from any of the above, or from benchmark datasets. The 11 volume EM images had previously  
650 been annotated by a different deep learning model and then manually corrected, while all the 2D  
651 images were manually annotated from scratch. Legacy volume EM images and instance



652 segmentations were cropped into patches of 512x512 and passed through the deduplication and  
653 filtering pipeline from CEM500K<sup>58</sup> to remove redundant and uninformative patches. Patches  
654 from isotropic voxel volumes were taken from xy, xz and yz planes while patches from  
655 anisotropic volumes were taken from xy only. For external data comprising the legacy datasets,  
656 all images were used as-is, except: prior to cropping patches, the MitoEM-H and MitoEM-R  
657 volumes were binned by a factor of two in x and y (from 8 nm to 16 nm pixels), and all Heinrich  
658 et al. images were downloaded at 8 nm resolution.

659

#### 660 *Benchmark dataset creation*

661

662 Four of the six benchmark volume EM datasets were independently annotated by ariadne.ai  
663 (HeLa cell, C. elegans, fly brain, salivary gland). The glycolytic muscle<sup>35</sup> dataset was binned by  
664 a factor of 2 in all dimensions (from 9 nm to 18 nm voxels) and then automatically annotated by  
665 a deep learning model that was trained solely on patches from the volume, and then manually  
666 corrected. The remaining benchmark is derived from the Lucchi++<sup>25,40</sup> benchmark. First, the 2D  
667 images and labelmaps were stacked to form volumes. Then, the binary mitochondrial labelmaps  
668 were converted to rough instance segmentations by applying a connected components filter and  
669 then manually corrected to derive the final instance segmentation.

670

671 Not only were all benchmark volumes excluded from both CEM1.5M and crowdsourced  
672 annotation, **we also excluded** any images related to them to rigorously test generalization,  
673 **Supplementary Figure 6**. OpenOrganelle<sup>39</sup>, which was the source of the fly brain benchmark,  
674 included multiple volumes of fly brain tissue from different brain areas. We chose the  
675 “Drosophila brain: Fan-shaped body” volume and excluded the “Drosophila brain: Entire alpha  
676 and alpha' lobes of a mushroom body” and “Drosophila brain: Accessory calyx” volumes. For  
677 the C. elegans volume, a related FIB-SEM and STEM dataset were excluded. And lastly, for the  
678 Lucchi++<sup>25,40</sup> benchmark, the Lucchi++ training set was excluded.

679

#### 680 *Benchmark datasets measurements*

681

682 Mitochondrial volumes were calculated by trivially counting the number of voxels per instance.  
683 Minimum distances between neighboring mitochondria were calculated by computing the  
684 distance transform of each instance's complement (i.e., set of all voxels not inside the instance).  
685 These results were stored in a new volume (called "distance volume") where each voxel was  
686 updated to the minimum distance calculated so far from all the measured complements at that  
687 location. The minimum distance to a mitochondrion's nearest neighbor was then the minimum  
688 value enclosed by that instance in the distance volume. Branch lengths and cross-sectional  
689 diameters were calculated by first skeletonizing<sup>63</sup> each mitochondrion and computing its distance  
690 transform. Branches shorter than 60 nm were pruned. Lengths were simply the number of voxels  
691 in each branch, and the mean cross-sectional diameter was the average of all values in the  
692 distance transform that overlapped with the skeleton.

693

#### 694 *CEM1.5M Pretraining*

695

696 Unsupervised pretraining followed the SwAV algorithm<sup>64</sup>. A ResNet50<sup>65</sup> model was trained for  
697 200 epochs with a batch size of 256. All other hyperparameters used the default values defined in  
698 <https://github.com/facebookresearch/swav>. Image augmentations included 360-degree  
699 rotations, randomly resized crops (following SwAV defaults), brightness and contrast jitter,  
700 random Gaussian blur and noise, and horizontal and vertical flips. To correct for the imbalance  
701 in the number of patches per dataset, weighted random sampling was applied. Weights per  
702 dataset were calculated by:

$$w_i = \frac{n_i^{-\gamma}}{\sum_{j=1}^N w_j}$$

703  $\gamma$  was a float from 0 to 1,  $n_i$  was the number of patches from the  $i^{th}$  dataset, and N was the total  
704 number of datasets. Each patch was assigned a sampling weight based on its source dataset.  
705 When  $\gamma = 0$ , patches from all datasets were sampled with the same probability (true random  
706 sampling) and when  $\gamma = 1$  the sampling was perfectly balanced between datasets. During  
707 pretraining we set  $\gamma = 0.5$  (i.e., the square root of the number of patches per dataset).

708

#### 709 *Deep learning model architecture*

710

711 The model was based on Panoptic-DeepLab<sup>42</sup> (PDL). In brief, PDL is an encoder-decoder style  
712 network that uses atrous spatial pyramid pooling (ASPP) to integrate features that occur over  
713 multiple scales. A ResNet50 encoder, pretrained as detailed above, was used in all experiments  
714 unless otherwise noted. To preserve more spatial information, strides in the last downsampling  
715 layer were replaced with dilation such that the output from the encoder was 16x smaller than the  
716 input (compared to 32x smaller with strides). The baseline model configuration included two  
717 ASPP modules and decoders; one for semantic segmentation prediction and the other for  
718 instance center and offsets prediction. Since input patches used during training were just  
719 256x256, the dilation rates in the ASPP modules were set to 2, 4 and 6 with 256 channels per  
720 convolution and dropout with probability 0.5 applied to the output. The semantic and instance  
721 decoders each had a single level at which the output from the first layer in the encoder (4x  
722 smaller than the input image) was fused via depthwise separable convolution with the  
723 interpolated output from the ASPP module. Following the standard for PDL, the convolution  
724 channels in the instance decoder were half of those in the semantic decoder (16 compared to 32).  
725 The semantic segmentation, instance center and offset heads used a single depthwise separable  
726 convolution with kernel size of 5.

727

728 *PointRend*: During training, the semantic segmentation logits predicted by PDL were upsampled  
729 by a factor of 4 to the original image resolution and then refined for a single step by the  
730 PointRend<sup>66</sup> module. For a batch of images, a set of 3,072 points were randomly sampled from  
731 anywhere within the dimensions of the images and the segmentation logits were evaluated at  
732 these points. From these sampled logits, 1,024 were selected for each image where 25% of the  
733 logits were randomly chosen and the other 75% were the logits with the smallest absolute values.  
734 The same 1,024 points were also used to sample features from the semantic decoder output.  
735 Sampled features and logits were concatenated and fed through a three-layer fully connected  
736 network. When evaluating the loss, the 1,024 points were also used to sample the ground truth  
737 semantic segmentation. Loss was calculated as the (binary) cross-entropy between the sampled  
738 and refined logits and the sampled ground truth. During evaluation, two refinement steps were  
739 applied with the semantic segmentation logits being upsampled by a factor of 2 at each step.  
740 Points corresponding to the center of all logit pixels were used to sample the logits. From these,  
741 points corresponding to the 8,192 logits with the smallest absolute values were selected. The

742 logits and semantic decoder output were sampled at these points and passed through the fully  
743 connected network. The refined logits then replaced the unrefined logits in the upsampled  
744 segmentation. Since the number of sampled points was fixed, the cost of running PointRend  
745 refinement was approximately constant with respect to the size of the input.

746

747 *Model training parameters*

748

749 The overall loss function during training was:

$$\mathcal{L} = \mathcal{L}_{sem} + \alpha * \mathcal{L}_{center} + \beta * \mathcal{L}_{offset} + \gamma * \mathcal{L}_{pr}$$

750  $\alpha, \beta, \gamma$  were constants used to weight the relative contributions of each loss and were set to 200,  
751 0.01 and 1.  $\mathcal{L}_{sem}$  was the semantic segmentation loss computed as the bootstrapped (binary)  
752 cross-entropy where only the top 20% of largest cross-entropy values were averaged across a  
753 batch.  $\mathcal{L}_{center}$  was the instance center regression loss and  $\mathcal{L}_{offset}$  was the center offset loss  
754 calculated as mean squared error and absolute error (L1), respectively.  $\mathcal{L}_{pr}$  was the PointRend  
755 loss calculated as the (binary) cross-entropy.

756

757 All models were trained using the One Cycle learning rate policy<sup>67</sup> with AdamW<sup>68</sup>. The max  
758 learning rate was set of 0.003 with weight decay of 0.1 and momentum was cycled from 0.85 to  
759 0.95. Learning rate warmup lasted for the first 30% of training epochs. Weighted sampling of  
760 patches from datasets was implemented as above ( $\gamma = 0.3$  here) to correct for overrepresented  
761 datasets in CEM-MitoLab. Image augmentations included large scale jitter<sup>69</sup>, where images were  
762 zoomed in by a maximum of 2x and zoomed out by a maximum of 10x, random cropping to a  
763 256x256 patch, 360-degree rotations, brightness and contrast adjustments and vertical and  
764 horizontal flips. Like CEM1.5M pre-training, images were selected from datasets based on  
765 weighted sampling. Unless otherwise noted,  $\gamma = 0.3$  was used for all training runs.

766

767 *Panoptic-DeepLab Postprocessing*

768

769 First, values in the instance center heatmap that were less than the center confidence threshold  
770 (0.1 in all experiments) were zeroed. Non-maximum suppression with a kernel size of 7 was  
771 applied to filter out peaks in the heatmap that occurred within the same 7x7 grid. The non-zero

772 coordinates that remained in the heatmap were extracted. Next, the instance center offsets were  
773 added to their absolute (x, y) positions within the image such that all pixels belonging to the  
774 same object ought to be equal to the coordinate that defines the center of that object. The  
775 Euclidean distance between this map of each pixel's corresponding object center and the centers  
776 extracted from the heatmap were used to group pixels into instances. The index of the center  
777 with the minimum distance at each pixel was adopted as the instance label for that pixel. After  
778 applying the sigmoid activation to get probabilities from the semantic segmentation logits and  
779 hardening the result over a threshold, the instance labels and semantic segmentation were merged  
780 to form the final panoptic segmentation.

781

### 782 *Stack instance matching*

783

784 To match object instances between consecutive slices in a 2D stack, intersection-over-union  
785 (IoU) scores were first calculated between instance bounding boxes. Second, for each pair of  
786 instances with non-zero bounding box IoU, a mask IoU was calculated and stored in a matrix of  
787 size  $K \times N$ , where  $K$  is the number of instances in slice  $j$  and  $N$  is the number of instances in slice  
788  $j+1$ . At this stage, mask intersection-over-area (IoA) scores were also calculated and stored in a  
789 separate  $K \times N$  matrix. The Hungarian algorithm<sup>47</sup> was then applied to the mask IoU matrix to  
790 determine the assignment of instances in slice  $j$  to instances in slice  $j+1$  that maximized the total  
791 IoU. Any unassigned instances in slice  $j+1$ , or assigned instances with IoU less than a threshold  
792 value (IoU threshold), were considered unmatched. Unmatched instances with a IoA score  
793 greater than a threshold value (IoA threshold) were matched to the instance in slice  $j$  with which  
794 they shared the highest IoA. The remaining unmatched instances were assigned new labels in the  
795 stack. After forward matching (i.e., from slice  $j$  to slice  $j+1$ ) was completed for all images in the  
796 stack, a backward pass of matching was conducted (i.e., from slice  $j$  to slice  $j-1$ ). No new labels  
797 were assigned in the stack during the reverse pass.

798

### 799 *Benchmark Set Inference*

800

801 Ortho-plane inference<sup>48</sup> on  $xy$ ,  $xz$  and  $yz$  planes was applied to each volume in the benchmark  
802 test set. During inference over each plane, semantic segmentations were generated from the

803 median probabilities within a short queue of previous and subsequent segmentation results. A  
804 queue length of 3 was used for the *C. elegans* and fly brain volumes, 5 for the HeLa and  
805 glycolytic muscle volumes and 7 for the Lucchi++ and salivary gland volumes. These queue  
806 lengths roughly track with voxel size (in nm) such that smaller voxels corresponded to longer  
807 queues. Median probabilities were hardened at a confidence threshold of 0.3. Since mitochondria  
808 were never occluded in any of our benchmark volumes, mitochondrial instances on each 2D slice  
809 were required to be connected components. Instance matching across slices used IoU and IoA  
810 thresholds of 0.25. After a forward and backward matching pass, a simple size and bounding box  
811 extent filter were applied to eliminate likely false positives. The minimum object size was set at  
812 the 5<sup>th</sup> percentile of mitochondrial volume for each benchmark while the minimum bounding box  
813 extent was fixed at eight voxels for all datasets. Finally, the same algorithm that was used to  
814 generate consensus segmentations during crowdsourced annotation was applied to ensemble the  
815 three segmentation stacks created by ortho-plane inference (**Supplementary Figure 3**). A clique  
816 IoU threshold of 0.75 was used for all volumes and a vote threshold of 2 out of 3 was used for all  
817 benchmarks except the *C. elegans* and salivary gland volumes. For those a vote threshold of 1  
818 out of 3 was used. This was in response to the relatively low consensus strength between each  
819 stack and the final ortho-plane result. Lowering the threshold gave a significant increase in  
820 performance on the *C. elegans* volume and a modest increase for the salivary gland volume.

821

### 822 *Salivary gland finetuning*

823

824 The salivary gland volume was first cropped into patches of 224x224 and then deduplicated and  
825 filtered (see *Training dataset creation* section above). 64 patches (~0.2% of the volume) were  
826 randomly selected from the filtered subset and set aside as the finetuning training set. The best  
827 performing segmentation model was retrained on the finetuning training set for 500 iterations  
828 using the same parameters outline in the *Model training parameters* section above.

829

### 830 *Benchmark Evaluation*

831

832 Ground truth instance segmentations were stored in json files where each entry contained an  
833 instance id, bounding box and run-length encoded segmentation. Equivalent json files were

834 created for all predictions. Instances between the ground truth and prediction were assigned as  
835 matches using the Hungarian algorithm to maximize IoU over all possible pairs of instances. In  
836 addition to the F1, IoU, and PQ scores reported in results, average precision (AP) scores for  
837 future comparison.

838

#### 839 *Test Set Evaluation by Training Dataset*

840

841 To prepare datasets for fair comparison, the MitoEM and Heinrich et al. ground truth ROIs were  
842 sliced to 2D images. Since the MitoEM volumes were large and anisotropic, patches of size  
843 512x512 were cropped from xy slices only. The Heinrich et al. volumes being small and  
844 isotropic were cropped into patches of 224x224 or smaller from xy, xz and yz planes. As above,  
845 mitochondrial instances were relabeled on each 2D slice to guarantee that they were connected  
846 components. All models were trained for approximately 10,000 iterations.

847



848 **Acknowledgements**

849

850 This project has been funded in whole or in part with Federal funds from the National Cancer  
851 Institute, National Institutes of Health, under Contract No. 75N91019D00024. The content of  
852 this publication does not necessarily reflect the views or policies of the Department of Health  
853 and Human Services, nor does mention of trade names, commercial products, or organizations  
854 imply endorsement by the U.S. Government. This publication uses data generated via the  
855 Zooniverse.org platform, development of which is funded by generous support, including a  
856 Global Impact Award from Google, and by a grant from the Alfred P. Sloan Foundation. We  
857 thank Helen Spiers, Martin Jones and Lucy Collinson for help with Zooniverse project set up.  
858 We thank the WHK-SIP program and Batch of 2021 student annotators, with special thanks to  
859 student leaders Ella Fitzgerald and Taeun Kim. Valentina Baena, Adam Harned, Kunio  
860 Nagashima and Heather Berensmann helped perform proofreading. Patrick Friday helped curate  
861 metadata, and Aayush Bhatawadekar contributed to renderings and plugin development. Finally  
862 we appreciate the volume EM community, especially the Data Working Group for general  
863 discussions in this space. This work utilized the computational resources of the NIH HPC  
864 Biowulf cluster. (<http://hpc.nih.gov>).

865

866

867

868 **Figure Legends**

869

870 **Figure 1: Creation of a diverse and representative dataset for mitochondrial instance**  
871 **segmentation. a.** Schematic of the data curation pipeline. Volume EM reconstructions and 2D  
872 EM images were curated<sup>58</sup> to create CEM1.5M, an unlabeled dataset of  $\sim 1.5 \times 10^6$  image  
873 patches used for self-supervised pretraining. Approximately 6,000 randomly sampled patches  
874 from CEM1.5M (green) were uploaded to the Zooniverse platform for crowdsourced annotation.  
875 These, and 16,000 randomly selected patches from previously labeled data (legacy annotations,  
876 red) were combined to form the supervised mitochondrial training dataset CEM-MitoLab. **b.**  
877 Lorenz plots for CEM1.5M (blue, Gini coefficient = 0.802), crowdsourced data (green, 0.209),  
878 legacy data (red, 0.840), CEM-MitoLab (dashed gray, 0.686). Black line, perfect equality in  
879 distribution (Gini = 0). **c.** Distribution of imaging plane pixel sizes for volume EM images in  
880 CEM-MitoLab. The dashed lines denote pixel sizes for 2D EM images in the dataset. **d.** Imaging  
881 technique, **e.** Source organism, **f.** Source tissue (vertebrates only, *in vitro* cells grouped under  
882 Not Defined) of datasets in CEM-MitoLab (n=478).

883

884 **Supplementary Figure 1: a.** Distribution of longest image side in pixels for patches in the  
885 supervised mitochondrial dataset, CEM-MitoLab. **b.** Breakdown of isotropic versus anisotropic  
886 data (left) and sample fixation method (right) in source datasets that make up CEM-MitoLab **c.**  
887 Random selection of image patches from CEM-MitoLab (left), Mito-EM (middle) and Heinrich  
888 et al **d.** Comparison between 2D mitochondrial instance label maps in CEM-MitoLab (blue),  
889 MitoEM (purple) and Heinrich et al. (pink) labeled datasets, with respect to (left to right) area in  
890 pixels, contrast, eccentricity, perimeter to area ratio, and clustering.

891

892 **Figure 2: Crowdsourced annotation of CEM-MitoLab. a.** Ground truth (top left), consensus  
893 annotation (bottom left) and ten independent student annotations of an image showing high  
894 degree of consensus. **b.** Instance segmentation quality measured by F1@50 over time. Left,  
895 Group 1a (expert annotation), 1b, 2, 3 (students). Blue dots, individual scores, pink, consensus  
896 score, box denotes median, 25<sup>th</sup> and 75<sup>th</sup> percentile. Right, change in individual annotator  
897 performance over time. **c-f** Instance segmentation quality measured by F1@50 plotted against **c.**  
898 Increase in retirement limit. Blue, purple, student scores (retirement set at 10); green, expert

899 score (retirement set at 5), **d.** Vote threshold. Blue, F1 per instance; pink, F1 per image; dashed  
900 line, vote threshold of 5 chosen for consensus calculation, **e.** Self-reported confidence score over  
901 all instances (connected line, average F1), **f.** Student mean confidence score, **f.** Number of  
902 images annotated by each students.

903

904 **Supplementary Figure 2: a.** Screenshots from Zooniverse project, showing the crowdsourc  
905 annotation user interface **b.** Total count of instance False Positive and False Negative errors  
906 made by student annotators. **c.** Ground truth (top left), consensus annotation (bottom left) and ten  
907 independent student annotations of an image showing a low degree of consensus; the all-or-  
908 nothing pattern suggest differences in individual knowledge or experience. **d.** Trends of true  
909 positive (blue), false positive (red), false negative (green) for total instances of mitochondria,  
910 plotted against vote threshold. A threshold of 5 was chosen for consensus calculation.

911

912 **Supplementary Figure 3. Example of consensus algorithm splitting and merging instance**  
913 **votes to create accurate consensus label maps.** See Materials and Methods for details.

914

915 **Figure 3: Challenging and diverse benchmarks for evaluating automatic instance**  
916 **segmentation performance. a.** 2D representative images (left) and 3D reconstructions (right)  
917 for the benchmark test sets. From top to bottom: *C. elegans*, Fly brain, HeLa cell, Glycolytic  
918 muscle, Salivary gland, Lucchi++. Yellow arrow, membranous organelle, orange and blue  
919 arrows, lightly and darkly stained mitochondria, green arrow, heavy metal precipitate, red arrow,  
920 mitochondrion and tightly apposed salivary granule in the acinus **b.** Comparison of individual  
921 mitochondria and box plots across benchmarks by (top to bottom): volume, branch length, cross-  
922 section radius, minimum distance to neighbor (all in voxels) and contrast. Pink, *C. elegans*  
923 n=241; yellow, Fly brain n=91; green, HeLa cell n=68; teal, Glycolytic muscle n=104; blue,  
924 Salivary gland n=131; purple, Lucchi++ n=33.

925

926 **Figure 4: Deep learning model and postprocessing pipeline to create 2D or 3D instance**  
927 **segmentations. a.** Schematic of Panoptic-DeepLab. A grayscale image (left) is passed through  
928 the model architecture: blue boxes denote outputs from the encoder layers, black boxes output  
929 from atrous spatial pyramid pooling (ASPP) layers, gray boxes output from decoder layers.

930 Outputs of the network are (left to right) semantic segmentation, up-down offsets, left-right  
931 offsets and instance centers. Far right, instance segmentation created from the outputs. **b.**  
932 Instance matching across adjacent slices with partially overlapping segmentation uses  
933 intersection-over-union (IoU) and intersection-over-area (IoA) scores. Top row: predicted  
934 segmentation of slice  $j$  (left),  $j+1$  (right), bottom row: IoU only merging (left), IoU and IoA  
935 merging (right). **c.** Merging of labels with completely missing segmentation uses a median  
936 prediction over 3-7 stacks, in direction of black arrow, depending on size of gap **d.** From top to  
937 bottom: Stacked 2D segmentations before matching, after forward matching only and after  
938 forward and backward matching, to merge falsely split mitochondria. Black arrows denote  
939 direction of matching. **e.** An example of 3D instance segmentation of mitochondria after running  
940 inference in (left to right)  $xy$ ,  $xz$ , and  $yz$  directions, and far right, merged instance segmentation  
941 after combining inferences from orthogonal planes.

942

943 **Supplementary Figure 4.** Example image showing difference in semantic segmentation borders  
944 of closely apposed mitochondria, after linear interpolation (top) or PointRend (bottom). Blue  
945 dots, PointRend sampling locations.

946

947 **Figure 5. MitoNet results on benchmarks.** **a.** Representative 2D images showing MitoNet  
948 segmentation performance. Top to bottom: *C. elegans*, Fly brain, HeLa cell, Glycolytic muscle,  
949 Lucchi++, Salivary gland before model finetuning, Salivary gland after model finetuning. **b.**  
950 Representative ground truth and predicted segmentations from MitoNet. Red and green,  
951 predicted mitochondrial instances, blue and orange, ground truth instances. Blue arrow, highly  
952 branched mitochondrion, black arrow, example of segmentation expected to return a high IoU  
953 but low F1 score. **c.** Left, MitoNet F1score on each of the benchmarks as a function of IoU  
954 threshold; right, IoU scores **d.** Left, comparison of mean F1 score for models trained on different  
955 datasets plotted against IoU threshold, right, comparison of mean IoUs achieved by models  
956 trained on various datasets. All benchmarks except the salivary gland are included.

957

958 **Supplementary Figure 5. Analysis of True Positive and False Negative detections by**  
959 **MitoNet on benchmarks, grouped by different mitochondrial attributes.** Top to bottom:  
960 mitochondrial volume, minimum distance to nearest neighbor, branch length, branch mean cross-

961 sectional diameter (measurements by voxel) and mitochondrial contrast. Branch length and cross  
962 section plots exclude the Lucchi++ benchmark, as the branches for these mitochondria were  
963 shorter than the pruning threshold. Fine tuned model results are plotted for salivary gland.

964

965 **Supplementary Figure 6. Representative images of datasets that were excluded from**  
966 **CEM1.5M and CEM-MitoLab datasets, in order to maintain integrity of the test set.**

967 Images to the left of the black line are volumes in the test set (fly brain, C. elegans and  
968 Lucchi++). Images to the right show datasets that were excluded because they were considered  
969 too similar to the benchmarks.

970

971 **Supplementary Figure 7. Screenshot of the napari plugin empanada.**

972

973 **Table 1: Performance metrics of MitoNet across benchmarks. AP, Average Precision, PQ,**  
974 **Panoptic Quality**

975

976 **Table 2: Average performance of MitoNet versions pre-trained on CEM1.5M but trained**  
977 **on various annotated datasets**

978

979 **Supplementary Table 1: Average mitochondrial measurements for true positive, false**  
980 **negative MitoNet predictions across various benchmarks.**

981

982

983 **References**

- 984 1. Peddie, C. J. & Collinson, L. M. Exploring the third dimension: Volume electron  
985 microscopy comes of age. *Micron* **61**, 9–19 (2014).
- 986 2. Titze, B. & Genoud, C. Volume scanning electron microscopy for imaging biological  
987 ultrastructure. *Biol. Cell* **108**, 307–323 (2016).
- 988 3. Scheffer, L. K. *et al.* A connectome and analysis of the adult drosophila central brain.  
989 *Elife* **9**, 1–74 (2020).
- 990 4. Turner, N. L. *et al.* Reconstruction of neocortex: Organelles, compartments, cells, circuits,  
991 and activity. *Cell* **0**, 17 (2022).
- 992 5. Yin, W. *et al.* A petascale automated imaging pipeline for mapping neuronal circuits with  
993 high-throughput transmission electron microscopy. *Nat. Commun.* *2020 111* **11**, 1–12  
994 (2020).
- 995 6. Januszewski, M. *et al.* High-precision automated reconstruction of neurons with flood-  
996 filling networks. *Nat. Methods* **15**, 605–610 (2018).
- 997 7. Berning, M., Boergens, K. M. & Helmstaedter, M. SegEM: Efficient Image Analysis for  
998 High-Resolution Connectomics. *Neuron* **87**, 1193–1206 (2015).
- 999 8. Abdollahzadeh, A., Belevich, I., Jokitalo, E., Sierra, A. & Tohka, J. DeepACSON  
1000 automated segmentation of white matter in 3D electron microscopy. *Commun. Biol.* *2021*  
1001 *41* **4**, 1–14 (2021).
- 1002 9. Dorkenwald, S. *et al.* Automated synaptic connectivity inference for volume electron  
1003 microscopy. *Nat. Methods* *2017 144* **14**, 435–442 (2017).
- 1004 10. Funke, J. *et al.* Large Scale Image Segmentation with Structured Loss Based Deep  
1005 Learning for Connectome Reconstruction. *IEEE Trans. Pattern Anal. Mach. Intell.* **41**,  
1006 1669–1680 (2019).
- 1007 11. Heinrich, L. *et al.* Whole-cell organelle segmentation in volume electron microscopy. *Nat.*  
1008 *2021 5997883* **599**, 141–146 (2021).
- 1009 12. Guay, M., Emam, Z., Anderson, A., Aronova, M. & Leapman, R. Dense cellular  
1010 segmentation using 2D-3D neural network ensembles for electron microscopy. *bioRxiv*  
1011 *2020.01.05.895003* (2020) doi:10.1101/2020.01.05.895003.

- 1012 13. Žerovnik Mekuč, M. *et al.* Automatic segmentation of mitochondria and endolysosomes  
1013 in volumetric electron microscopy data. *Comput. Biol. Med.* **119**, 103693 (2020).
- 1014 14. Liu, J. *et al.* Automatic Reconstruction of Mitochondria and Endoplasmic Reticulum in  
1015 Electron Microscopy Volumes by Deep Learning. *Front. Neurosci.* **14**, 599 (2020).
- 1016 15. Spiers, H. *et al.* Deep learning for automatic segmentation of the nuclear envelope in  
1017 electron microscopy data, trained with volunteer segmentations. *Traffic* **22**, 240–253  
1018 (2021).
- 1019 16. Glancy, B., Kim, Y., Katti, P. & Willingham, T. B. The Functional Impact of  
1020 Mitochondrial Structure Across Subcellular Scales. *Frontiers in Physiology* vol. 11 1462  
1021 (2020).
- 1022 17. Vincent, A. E. *et al.* The Spectrum of Mitochondrial Ultrastructural Defects in  
1023 Mitochondrial Myopathy. *Sci. Rep.* **6**, 1–12 (2016).
- 1024 18. Vincent, A. E. *et al.* Quantitative 3D Mapping of the Human Skeletal Muscle  
1025 Mitochondrial Network. *CellReports* **26**, 996-1009.e4 (2019).
- 1026 19. Pernas, L. & Scorrano, L. Mito-Morphosis: Mitochondrial Fusion, Fission, and Cristae  
1027 Remodeling as Key Mediators of Cellular Function. *Annu. Rev. Physiol.* **78**, 505–531  
1028 (2016).
- 1029 20. Delgado, T. *et al.* Comparing 3D ultrastructure of presynaptic and postsynaptic  
1030 mitochondria. *Biol. Open* **8**, (2019).
- 1031 21. Stoldt, S. *et al.* Spatial orchestration of mitochondrial translation and OXPHOS complex  
1032 assembly. *Nat. Cell Biol.* **20**, 528–534 (2018).
- 1033 22. Meyer, J. N., Leuthner, T. C. & Luz, A. L. Mitochondrial fusion, fission, and  
1034 mitochondrial toxicity. *Toxicology* **391**, 42–53 (2017).
- 1035 23. Zhang, L. *et al.* Altered brain energetics induces mitochondrial fission arrest in  
1036 Alzheimer’s Disease. *Sci. Rep.* **6**, 1–12 (2016).
- 1037 24. Siegmund, S. E. *et al.* Three-Dimensional Analysis of Mitochondrial Crista Ultrastructure  
1038 in a Patient with Leigh Syndrome by In Situ Cryoelectron Tomography. *ISCIENCE* **6**, 83–  
1039 91 (2018).
- 1040 25. Casser, V., Kang, K., Pfister, H. & Haehn, D. Fast Mitochondria Segmentation for  
1041 Connectomics. *arXiv1812.06024 [cs]* (2018).
- 1042 26. Wei, D. *et al.* MitoEM Dataset: Large-scale 3D Mitochondria Instance Segmentation from



- 1043 EM Images. *Med. Image Comput. Comput. Assist. Interv.* **12265**, 66 (2020).
- 1044 27. Müller, A. *et al.* 3D FIB-SEM reconstruction of microtubule–organelle interaction in  
1045 whole primary mouse  $\beta$  cells. *J. Cell Biol.* **220**, (2021).
- 1046 28. Buhmann, J. *et al.* Automatic Detection of Synaptic Partners in a Whole-Brain Drosophila  
1047 EM Dataset. *bioRxiv* 2019.12.12.874172 (2019) doi:10.1101/2019.12.12.874172.
- 1048 29. Perez, A. J. *et al.* A workflow for the automatic segmentation of organelles in electron  
1049 microscopy image stacks. *Front. Neuroanat.* **8**, 126 (2014).
- 1050 30. Guay, M. D. *et al.* Dense cellular segmentation for EM using 2D–3D neural network  
1051 ensembles. *Sci. Reports 2021 111* **11**, 1–11 (2021).
- 1052 31. Leonard, A. P. *et al.* Quantitative analysis of mitochondrial morphology and membrane  
1053 potential in living cells using high-content imaging, machine learning, and morphological  
1054 binning. *Biochim. Biophys. Acta - Mol. Cell Res.* **1853**, 348–360 (2015).
- 1055 32. Nikolaisen, J. *et al.* Automated Quantification and Integrative Analysis of 2D and 3D  
1056 Mitochondrial Shape and Network Properties. *PLoS One* **9**, e101365 (2014).
- 1057 33. Talwar, A. *et al.* A Topological Nomenclature for 3D Shape Analysis in Connectomics.
- 1058 34. Miyazono, Y. *et al.* Uncoupled mitochondria quickly shorten along their long axis to form  
1059 indented spheroids, instead of rings, in a fission-independent manner OPEN. *Sci.*  
1060 *REPORTS* / **8**, 350 (2018).
- 1061 35. Bleck, C. K. E., Kim, Y., Willingham, T. B. & Glancy, B. Subcellular connectomic  
1062 analyses of energy networks in striated muscle. *Nat. Commun.* **9**, (2018).
- 1063 36. Abrisch, R. G., Gumbin, S. C., Wisniewski, B. T., Lackner, L. L. & Voeltz, G. K. Fission  
1064 and fusion machineries converge at ER contact sites to regulate mitochondrial  
1065 morphology. *J. Cell Biol.* **219**, (2020).
- 1066 37. Tamada, H. *et al.* Three-dimensional analysis of somatic mitochondrial dynamics in  
1067 fission-deficient injured motor neurons using FIB/SEM. *J. Comp. Neurol.* **525**, 2535–2548  
1068 (2017).
- 1069 38. Conrad, R. & Narayan, K. CEM500K, a large-scale heterogeneous unlabeled cellular  
1070 electron microscopy image dataset for deep learning. *Elife* **10**, (2021).
- 1071 39. Xu, C. S. *et al.* An open-access volume electron microscopy atlas of whole cells and  
1072 tissues. *Nat.* 2021 5997883 **599**, 147–151 (2021).
- 1073 40. Lucchi, A., Li, Y. & Fua, P. Learning for structured prediction using approximate

- 1074 subgradient descent with working sets. *Proc. IEEE Comput. Soc. Conf. Comput. Vis.*  
1075 *Pattern Recognit.* 1987–1994 (2013) doi:10.1109/CVPR.2013.259.
- 1076 41. Riddle, D. L. *et al.* *C. elegans II. Cold Spring Harbor Monograph Series, Vol. 33* (Cold  
1077 Spring Harbor Laboratory Press, 1997).
- 1078 42. Cheng, B. *et al.* Panoptic-DeepLab: A Simple, Strong, and Fast Baseline for Bottom-Up  
1079 Panoptic Segmentation. *arxiv1911.10194v2 [cs]* (2019).
- 1080 43. Ronneberger, O., Fischer, P. & Brox, T. U-net: Convolutional networks for biomedical  
1081 image segmentation. in *Lecture Notes in Computer Science (including subseries Lecture*  
1082 *Notes in Artificial Intelligence and Lecture Notes in Bioinformatics)* vol. 9351 234–241  
1083 (Springer Verlag, 2015).
- 1084 44. He, K., Gkioxari, G., Dollár, P. & Girshick, R. Mask R-CNN. *IEEE Trans. Pattern Anal.*  
1085 *Mach. Intell.* **42**, 386–397 (2020).
- 1086 45. Cheng, B., Misra, I., Schwing, A. G., Kirillov, A. & Girdhar, R. Masked-attention Mask  
1087 Transformer for Universal Image Segmentation. (2021) doi:10.48550/arxiv.2112.01527.
- 1088 46. Kirillov, A., Wu, Y., He, K. & Girshick, R. PointRend: Image Segmentation As  
1089 Rendering. in *Proceedings of the IEEE/CVF Conference on Computer Vision and Pattern*  
1090 *Recognition (CVPR)* 9799–9808 (2020).
- 1091 47. Kuhn, H. W. The Hungarian method for the assignment problem. *Nav. Res. Logist. Q.* **2**,  
1092 83–97 (1955).
- 1093 48. Conrad, R., Lee, H. & Narayan, K. Enforcing Prediction Consistency Across Orthogonal  
1094 Planes Significantly Improves Segmentation of FIB-SEM Image Volumes by 2D Neural  
1095 Networks. *Microsc. Microanal.* 1–4 (2020) doi:10.1017/s143192762002053x.
- 1096 49. Stringer, C., Wang, T., Michaelos, M. & Pachitariu, M. Cellpose: a generalist algorithm  
1097 for cellular segmentation. *Nat. Methods* **18**, 100–106 (2021).
- 1098 50. Vincent, L., Vincent, L. & Soille, P. Watersheds in Digital Spaces: An Efficient  
1099 Algorithm Based on Immersion Simulations. *IEEE Trans. Pattern Anal. Mach. Intell.* **13**,  
1100 583–598 (1991).
- 1101 51. He, K., Zhang, X., Ren, S. & Sun, J. Deep residual learning for image recognition. in  
1102 *Proceedings of the IEEE Computer Society Conference on Computer Vision and Pattern*  
1103 *Recognition* vols 2016-Decem 770–778 (IEEE Computer Society, 2016).
- 1104 52. Caron, M. *et al.* Unsupervised Learning of Visual Features by Contrasting Cluster

- 1105 Assignments. *Adv. Neural Inf. Process. Syst.* **2020-December**, (2020).
- 1106 53. Xiao, C. *et al.* Automatic mitochondria segmentation for EM data using a 3D supervised  
1107 convolutional network. *Front. Neuroanat.* **12**, 92 (2018).
- 1108 54. Bleck, C. K. E., Kim, Y., Willingham, T. B. & Glancy, B. Subcellular connectomic  
1109 analyses of energy networks in striated muscle. *Nat. Commun.* **9**, 1–11 (2018).
- 1110 55. Sarkans, U. *et al.* REMBI: Recommended Metadata for Biological Images—enabling  
1111 reuse of microscopy data in biology. *Nat. Methods* 1–5 (2021) doi:10.1038/s41592-021-  
1112 01166-8.
- 1113 56. Franco-Barranco, D., Muñoz-Barrutia, A. & Arganda-Carreras, I. Stable deep neural  
1114 network architectures for mitochondria segmentation on electron microscopy volumes.  
1115 *arXiv:2104.03577 [eess.IV]* (2021).
- 1116 57. Narayan, K. & Subramaniam, S. Focused ion beams in biology. *Nat. Methods* **12**, 1021  
1117 (2015).
- 1118 58. Conrad, R. & Narayan, K. Cem500k, a large-scale heterogeneous unlabeled cellular  
1119 electron microscopy image dataset for deep learning. *Elife* **10**, (2021).
- 1120 59. Sarkans, U. *et al.* REMBI: Recommended Metadata for Biological Images—enabling  
1121 reuse of microscopy data in biology. *Nat. Methods* 2021 1812 **18**, 1418–1422 (2021).
- 1122 60. Kikinis, R., Pieper, S. D. & Vosburgh, K. G. 3D Slicer: A Platform for Subject-Specific  
1123 Image Analysis, Visualization, and Clinical Support. in *Intraoperative Imaging and*  
1124 *Image-Guided Therapy* 277–289 (Springer New York, 2014). doi:10.1007/978-1-4614-  
1125 7657-3\_19.
- 1126 61. Kasthuri, N. *et al.* Saturated Reconstruction of a Volume of Neocortex. *Cell* **162**, 648–661  
1127 (2015).
- 1128 62. Žerovnik Mekuč, M. *et al.* Automatic segmentation of mitochondria and endolysosomes  
1129 in volumetric electron microscopy data. *Comput. Biol. Med.* **119**, 103693 (2020).
- 1130 63. Lee, T. C., Kashyap, R. L. & Chu, C. N. Building Skeleton Models via 3-D Medial  
1131 Surface Axis Thinning Algorithms. *CVGIP Graph. Model. Image Process.* **56**, 462–478  
1132 (1994).
- 1133 64. Caron, M. *et al.* Unsupervised Learning of Visual Features by Contrasting Cluster  
1134 Assignments. *arXiv* (2020).
- 1135 65. He, K., Zhang, X., Ren, S. & Sun, J. Deep Residual Learning for Image Recognition.

- 1136            *Proc. IEEE Comput. Soc. Conf. Comput. Vis. Pattern Recognit.* **2016-December**, 770–778  
1137            (2015).
- 1138    66.   Kirillov, A., Wu, Y., He, K. & Girshick, R. PointRend: Image Segmentation as Rendering.  
1139            (2019).
- 1140    67.   Smith, L. N. A disciplined approach to neural network hyper-parameters: Part 1 --  
1141            learning rate, batch size, momentum, and weight decay. *arxiv1803.09820 [cs]* (2018).
- 1142    68.   Loshchilov, I. & Hutter, F. Decoupled Weight Decay Regularization. *7th Int. Conf. Learn.*  
1143            *Represent. ICLR 2019* (2017).
- 1144    69.   Ghiasi, G. *et al.* *Simple Copy-Paste is a Strong Data Augmentation Method for Instance*  
1145            *Segmentation*. <https://cocodataset.org/>.
- 1146

## Figure 1

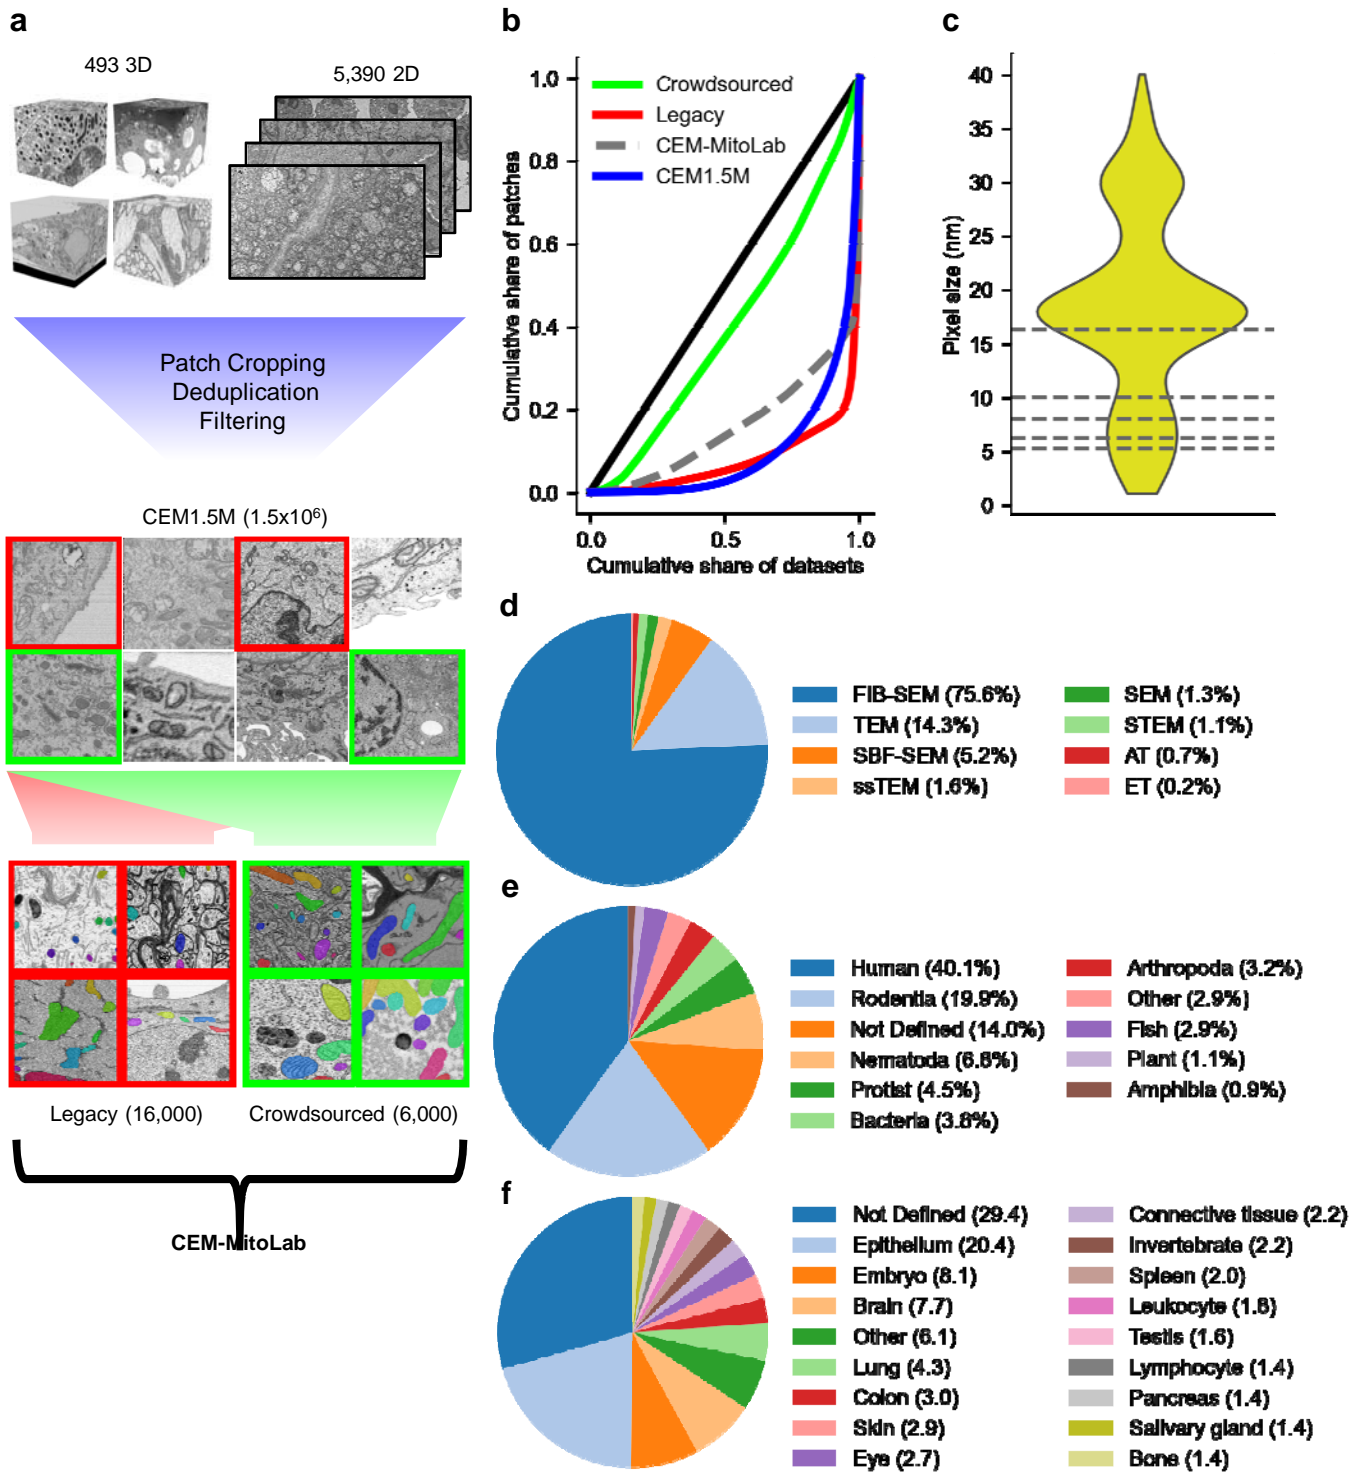

## Figure 2

a

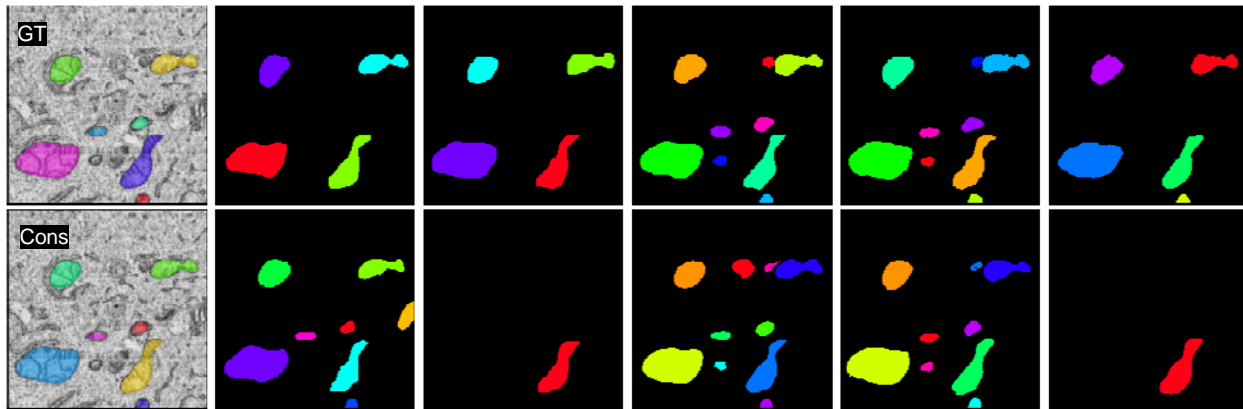

b

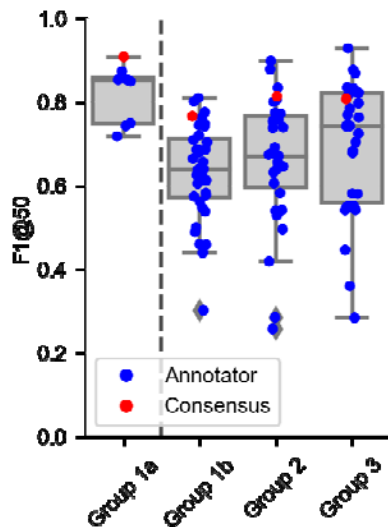

c

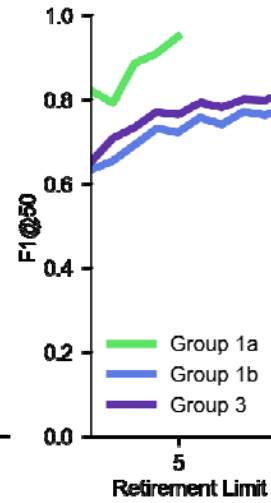

d

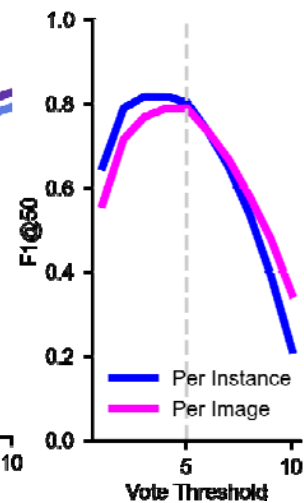

e

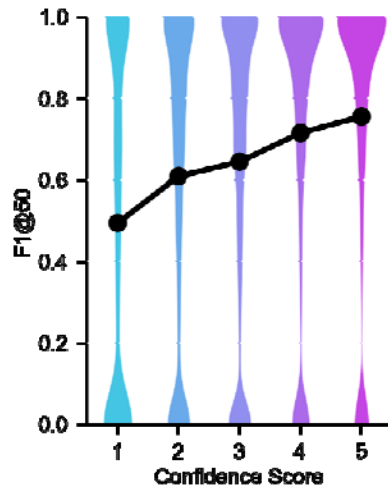

f

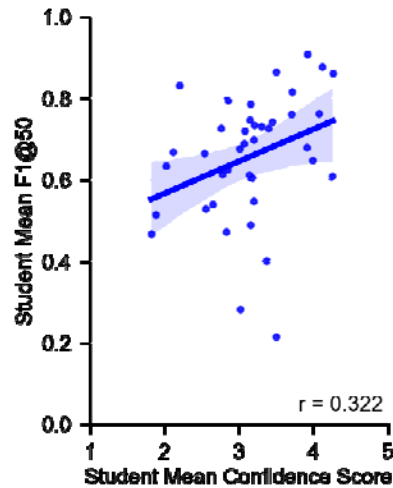

g

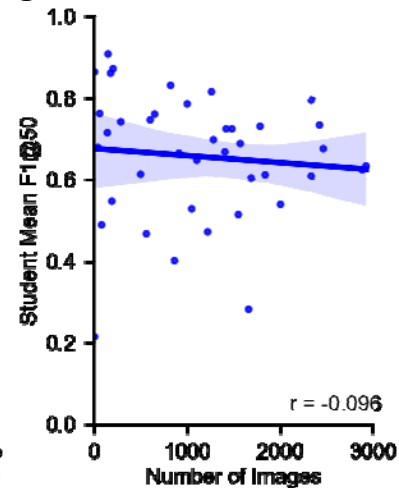



## Figure 3

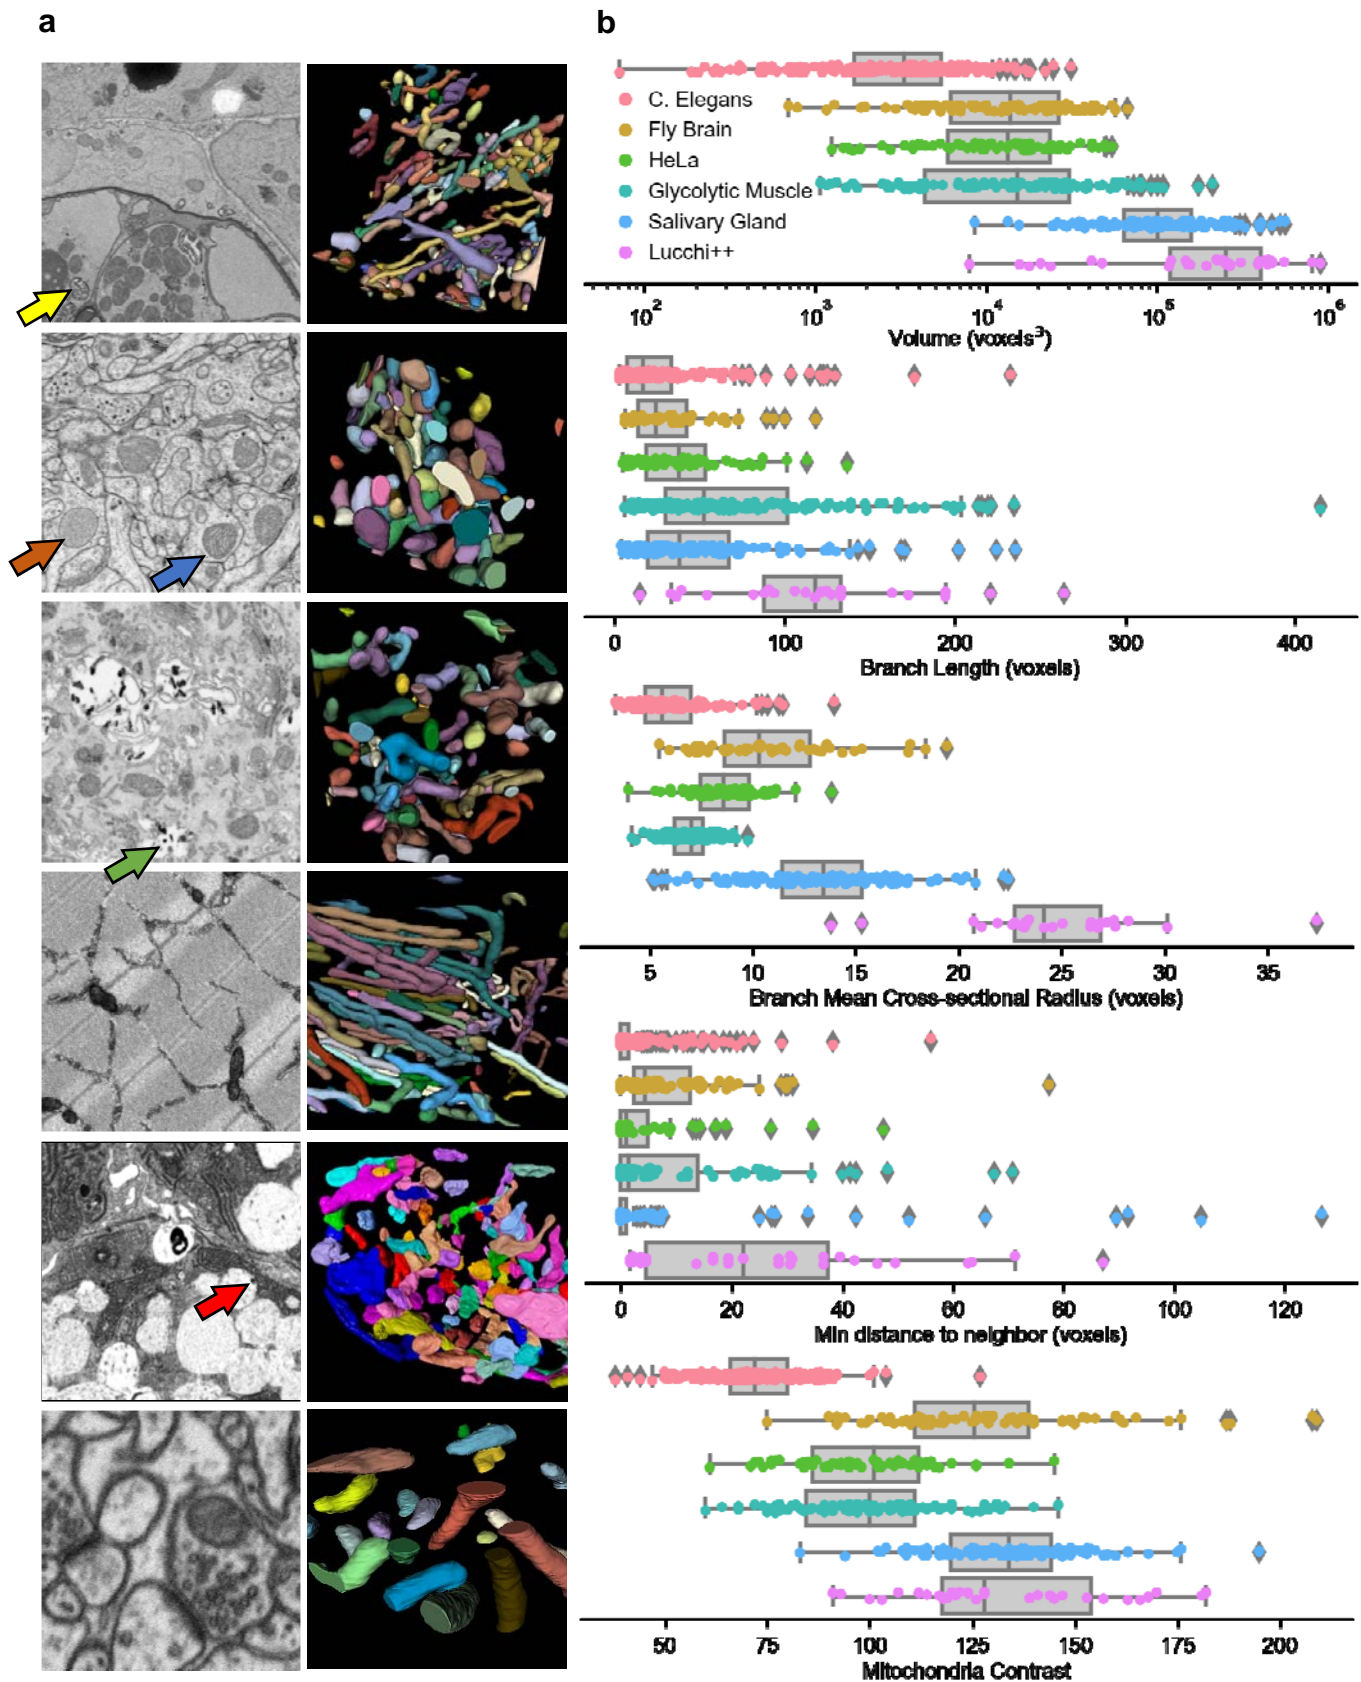



**Figure 4**

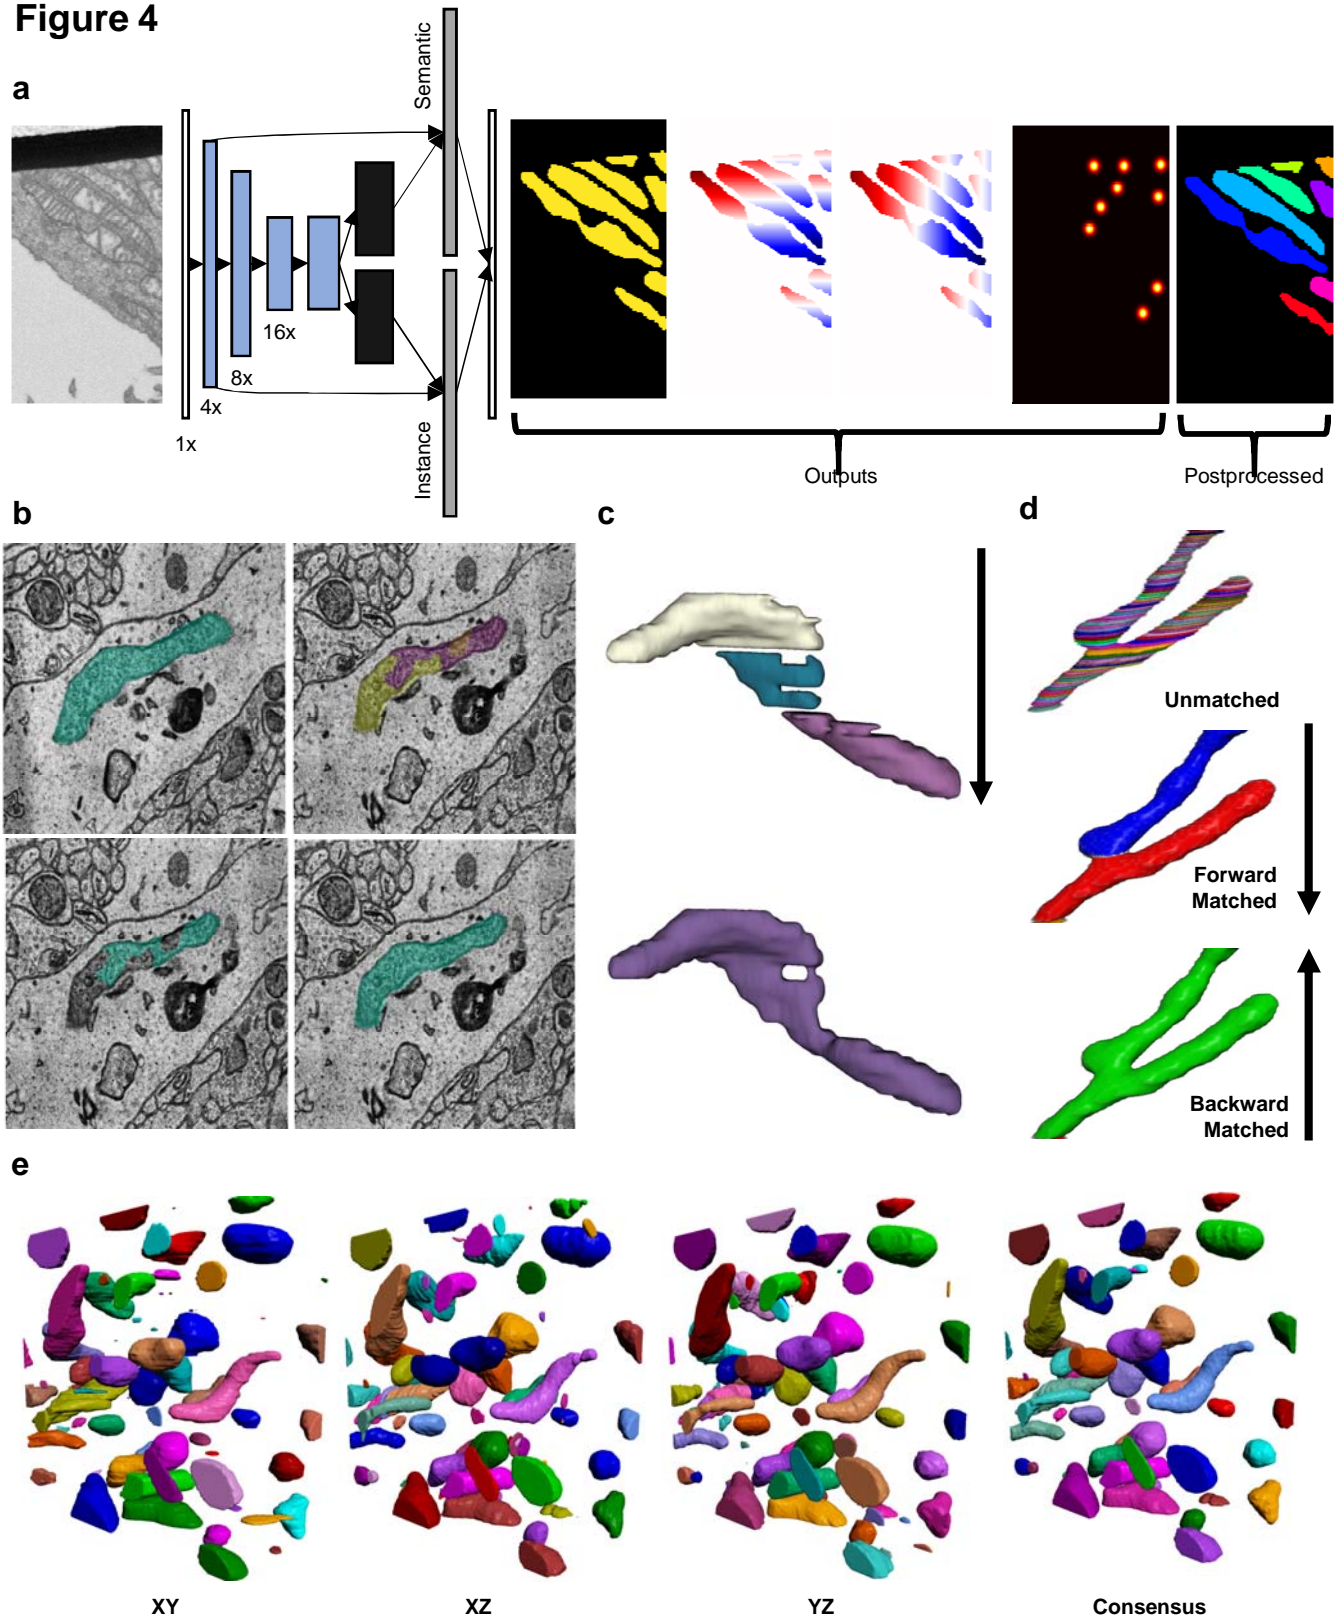

## Figure 5

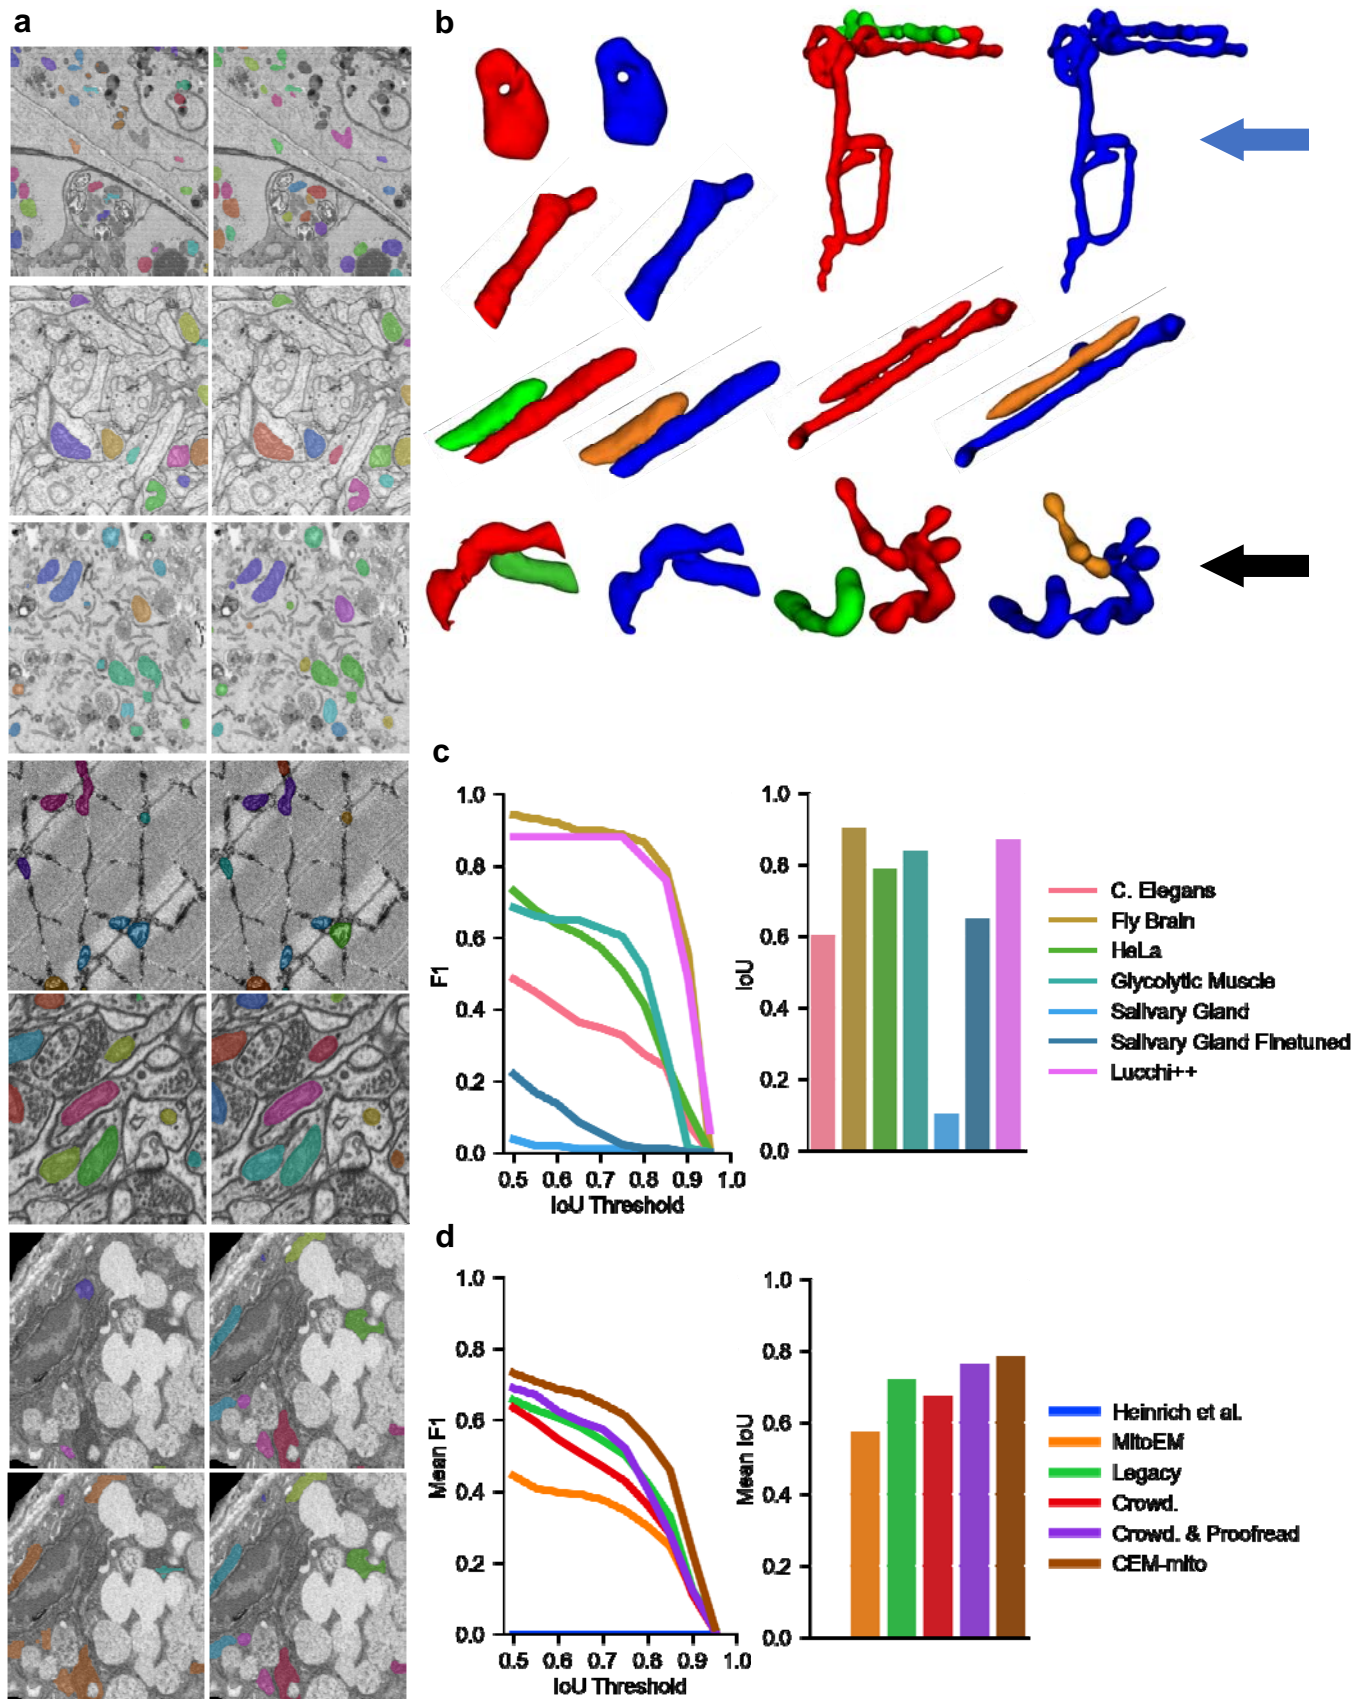

Source: https://www.biorxiv.org/content/10.1101/2022.03.17.484806v1.full.pdf
